# Supplementary material for: Simulation and practice of particle inertial focusing in 3D-printed serpentine microfluidic chips via commercial 3D-printers
Source: Royal Society of Chemistry journal article supplement (doi:10.1039/d0sm00084a), 2020-01-01
Supplement: d0sm00084a1.pdf [file d0sm00084a1.pdf]

**Supporting Information**

**Simulation and practice of particle inertial focusing  
in 3D-printed serpentine microfluidics via  
commercial 3D-printers**

Pengju Yin,<sup>a</sup> Lei Zhao,<sup>a</sup> Zezhou Chen,<sup>a</sup> Zhiqiang Jiao,<sup>a</sup> Hongyan Shi,<sup>a</sup> Bo Hu,<sup>\*,a</sup> Shifang Yuan,<sup>\*,b</sup>  
Jie Tian,<sup>\*,a,c</sup>

<sup>a</sup> School of Life Science and Technology, Library, Xidian University, Xi'an 710126, Shaanxi,  
People's Republic of China. Email: E-mail: bohu@xidian.edu.cn;

<sup>b</sup> Institute of Automation, Chinese Academy of Sciences, Beijing 100190, People's Republic of  
China. Email: jie.tian@ia.ac.cn;

<sup>c</sup> Department of Vascular and Endocrine Surgery, Xijing Hospital, The Fourth Military Medical  
University, Xi'an 710032, Shaanxi, People's Republic of China. Email: shifangy@fmmu.edu.cn;

\* Correspondence: bohu@xidian.edu.cn; shifangy@fmmu.edu.cn; jie.tian@ia.ac.cn

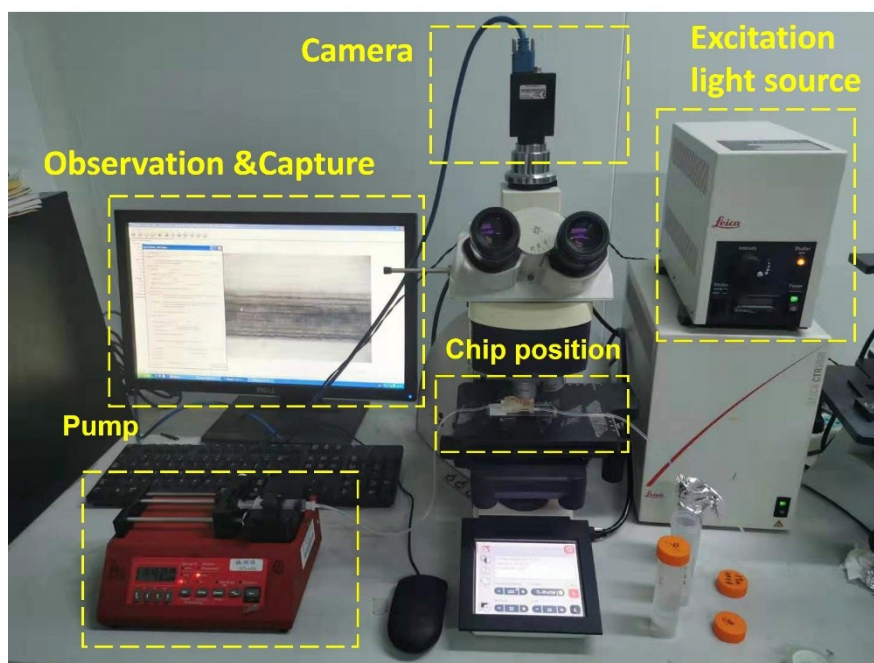

**Fig. S1.** Explanatory Chart of observation and capture images under particle focusing fluorescent experiment

**Table S1.** The technical details of Inkjet, SLA, DLP and FDM 3D printers.

| Print function         | Inkjet                                                                         | SLA            | DLP                  | FDM                                     |
|------------------------|--------------------------------------------------------------------------------|----------------|----------------------|-----------------------------------------|
| <b>3D-printer</b>      | Projet 3600HD                                                                  | Form 1+        | Miicraft +           | Guiders                                 |
| <b>Build size</b>      | 298X185X203mm                                                                  | 125X125X165mm  | 43X27X180mm          | 280X250X300mm                           |
| <b>XY resolutions</b>  | 25-50 $\mu$ m                                                                  | 155 $\mu$ m    | 56 $\mu$ m           | 100 $\mu$ m                             |
| <b>Z resolutions</b>   | 16 $\mu$ m                                                                     | 25-200 $\mu$ m | 30-100 $\mu$ m       | 100 $\mu$ m                             |
| <b>Print material</b>  | UV Curable Plastic                                                             | Photopolymer   | Photopolymer, BV-003 | ABS, PLA                                |
| <b>Print head</b>      | Multi-nozzle                                                                   | Single laser   | Surface forming      | Single nozzle                           |
| <b>Print speed</b>     | Medium                                                                         | Medium         | Medium               | High                                    |
| <b>Print cost</b>      | High                                                                           | Medium         | Medium               | Low                                     |
| <b>Input Data File</b> | STL, CTL, OBJ, PLY, ZPR, ZBD, AMF, WRL, 3DS, FBX, IGES, IGS, STEP, STP, MJPDDD | STL, OBJ       | STL                  | 3MF, STL, OBJ, FPP, BMP, PNG, JPG, JPEG |

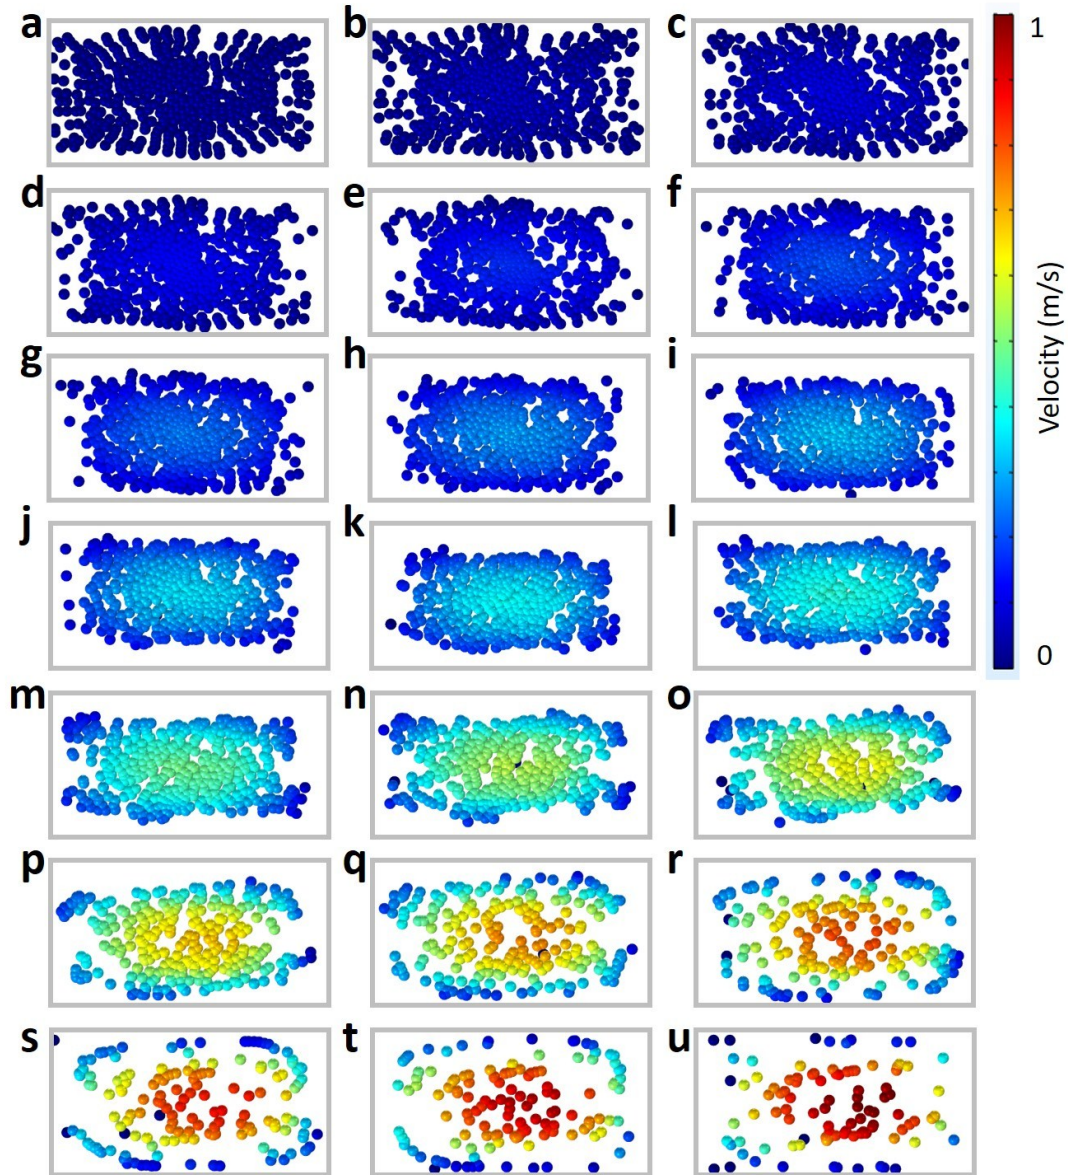

**Fig. S2.** The simulation results of different velocities (48  $\mu\text{L}/\text{min}$  – 2832  $\mu\text{L}/\text{min}$ ) in serpentine channel with the curvature of 4.0 mm. (a) 48  $\mu\text{L}/\text{min}$  (0.01 m/s), (b) 144  $\mu\text{L}/\text{min}$  (0.03 m/s), (c) 240  $\mu\text{L}/\text{min}$  (0.05 m/s), (d) 336  $\mu\text{L}/\text{min}$  (0.07 m/s), (e) 432  $\mu\text{L}/\text{min}$  (0.09 m/s), (f) 528  $\mu\text{L}/\text{min}$  (0.11 m/s), (g) 624  $\mu\text{L}/\text{min}$  (0.13 m/s), (h) 720  $\mu\text{L}/\text{min}$  (0.15 m/s), (i) 816  $\mu\text{L}/\text{min}$  (0.17 m/s), (j) 912  $\mu\text{L}/\text{min}$  (0.19 m/s), (k) 1008  $\mu\text{L}/\text{min}$  (0.21 m/s), (l) 1104  $\mu\text{L}/\text{min}$  (0.23 m/s), (m) 1296  $\mu\text{L}/\text{min}$  (0.27 m/s), (n) 1488  $\mu\text{L}/\text{min}$  (0.31 m/s), (o) 1680  $\mu\text{L}/\text{min}$  (0.35 m/s), (p) 1872  $\mu\text{L}/\text{min}$  (0.39 m/s), (q) 2064  $\mu\text{L}/\text{min}$  (0.43 m/s), (r) 2256  $\mu\text{L}/\text{min}$  (0.47 m/s), (s) 2448  $\mu\text{L}/\text{min}$  (0.51 m/s), (t) 2640  $\mu\text{L}/\text{min}$  (0.55 m/s), (u) 2832  $\mu\text{L}/\text{min}$  (0.59 m/s).

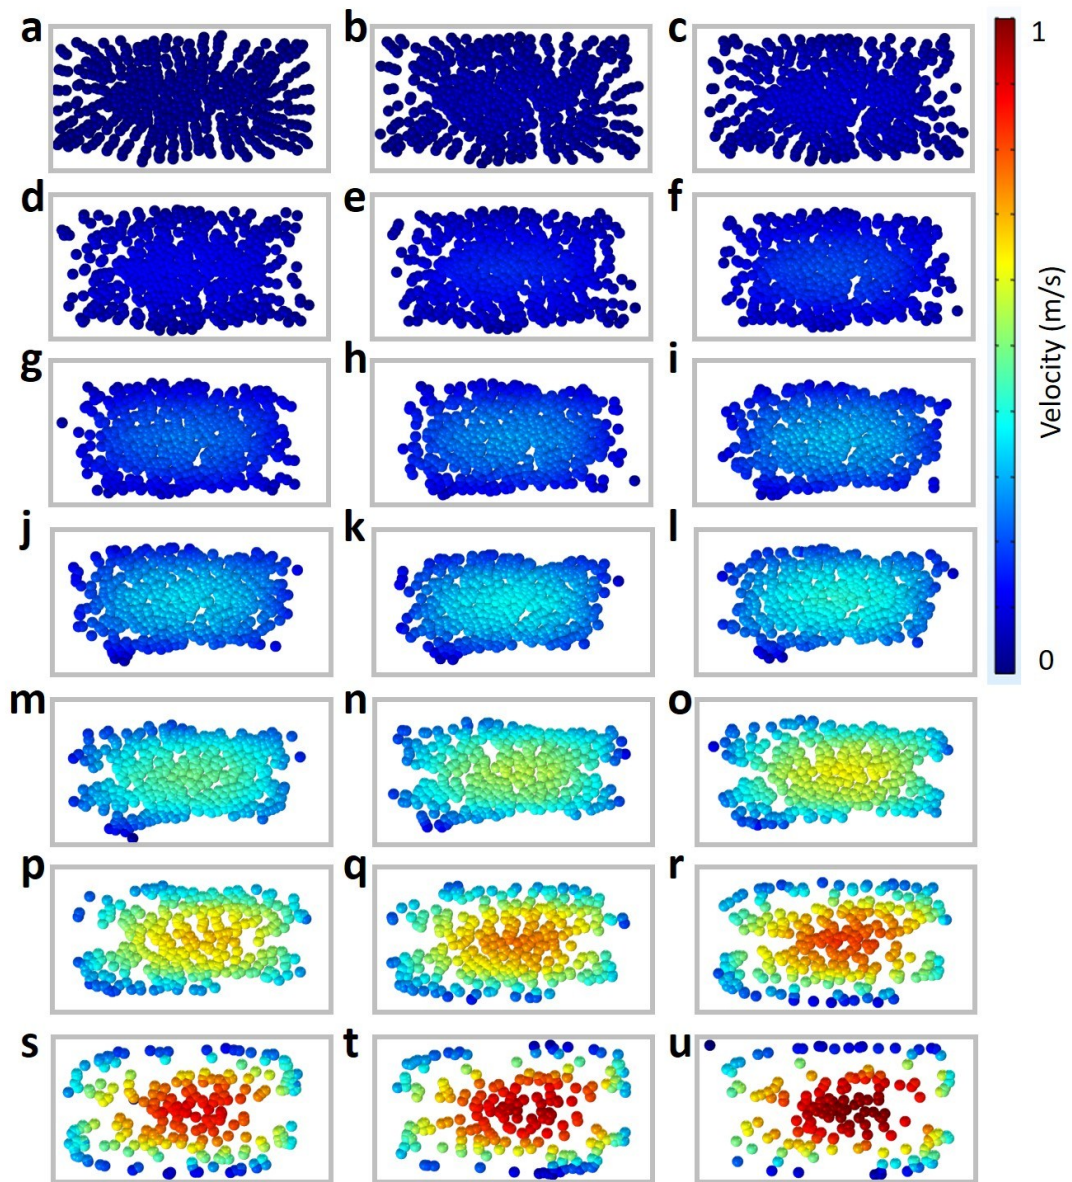

**Fig. S3.** The simulation results of different velocities (48  $\mu\text{L}/\text{min}$  – 2832  $\mu\text{L}/\text{min}$ ) in serpentine channel with the curvature of 4.5 mm. (a) 48  $\mu\text{L}/\text{min}$  (0.01 m/s), (b) 144  $\mu\text{L}/\text{min}$  (0.03 m/s), (c) 240  $\mu\text{L}/\text{min}$  (0.05 m/s), (d) 336  $\mu\text{L}/\text{min}$  (0.07 m/s), (e) 432  $\mu\text{L}/\text{min}$  (0.09 m/s), (f) 528  $\mu\text{L}/\text{min}$  (0.11 m/s), (g) 624  $\mu\text{L}/\text{min}$  (0.13 m/s), (h) 720  $\mu\text{L}/\text{min}$  (0.15 m/s), (i) 816  $\mu\text{L}/\text{min}$  (0.17 m/s), (j) 912  $\mu\text{L}/\text{min}$  (0.19 m/s), (k) 1008  $\mu\text{L}/\text{min}$  (0.21 m/s), (l) 1104  $\mu\text{L}/\text{min}$  (0.23 m/s), (m) 1296  $\mu\text{L}/\text{min}$  (0.27 m/s), (n) 1488  $\mu\text{L}/\text{min}$  (0.31 m/s), (o) 1680  $\mu\text{L}/\text{min}$  (0.35 m/s), (p) 1872  $\mu\text{L}/\text{min}$  (0.39 m/s), (q) 2064  $\mu\text{L}/\text{min}$  (0.43 m/s), (r) 2256  $\mu\text{L}/\text{min}$  (0.47 m/s), (s) 2448  $\mu\text{L}/\text{min}$  (0.51 m/s), (t) 2640  $\mu\text{L}/\text{min}$  (0.55 m/s), (u) 2832  $\mu\text{L}/\text{min}$  (0.59 m/s).



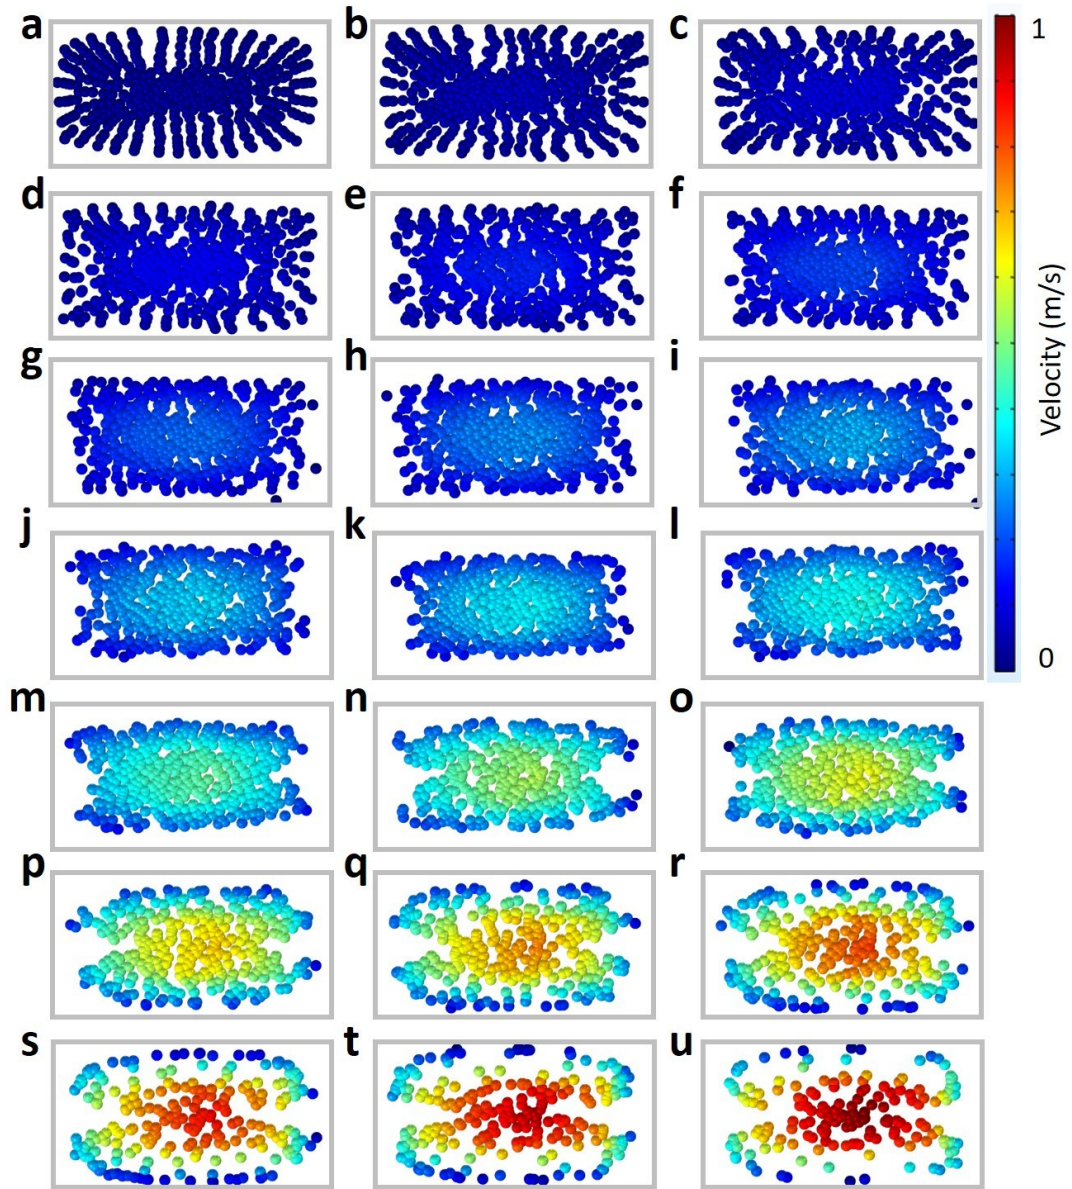

**Fig. S4.** The simulation results of different velocities (48  $\mu\text{L}/\text{min}$  – 2832  $\mu\text{L}/\text{min}$ ) in serpentine channel with the curvature of 5.0 mm. (a) 48  $\mu\text{L}/\text{min}$  (0.01 m/s), (b) 144  $\mu\text{L}/\text{min}$  (0.03 m/s), (c) 240  $\mu\text{L}/\text{min}$  (0.05 m/s), (d) 336  $\mu\text{L}/\text{min}$  (0.07 m/s), (e) 432  $\mu\text{L}/\text{min}$  (0.09 m/s), (f) 528  $\mu\text{L}/\text{min}$  (0.11 m/s), (g) 624  $\mu\text{L}/\text{min}$  (0.13 m/s), (h) 720  $\mu\text{L}/\text{min}$  (0.15 m/s), (i) 816  $\mu\text{L}/\text{min}$  (0.17 m/s), (j) 912  $\mu\text{L}/\text{min}$  (0.19 m/s), (k) 1008  $\mu\text{L}/\text{min}$  (0.21 m/s), (l) 1104  $\mu\text{L}/\text{min}$  (0.23 m/s), (m) 1296  $\mu\text{L}/\text{min}$  (0.27 m/s), (n) 1488  $\mu\text{L}/\text{min}$  (0.31 m/s), (o) 1680  $\mu\text{L}/\text{min}$  (0.35 m/s), (p) 1872  $\mu\text{L}/\text{min}$  (0.39 m/s), (q) 2064  $\mu\text{L}/\text{min}$  (0.43 m/s), (r) 2256  $\mu\text{L}/\text{min}$  (0.47 m/s), (s) 2448  $\mu\text{L}/\text{min}$  (0.51 m/s), (t) 2640  $\mu\text{L}/\text{min}$  (0.55 m/s), (u) 2832  $\mu\text{L}/\text{min}$  (0.59 m/s).

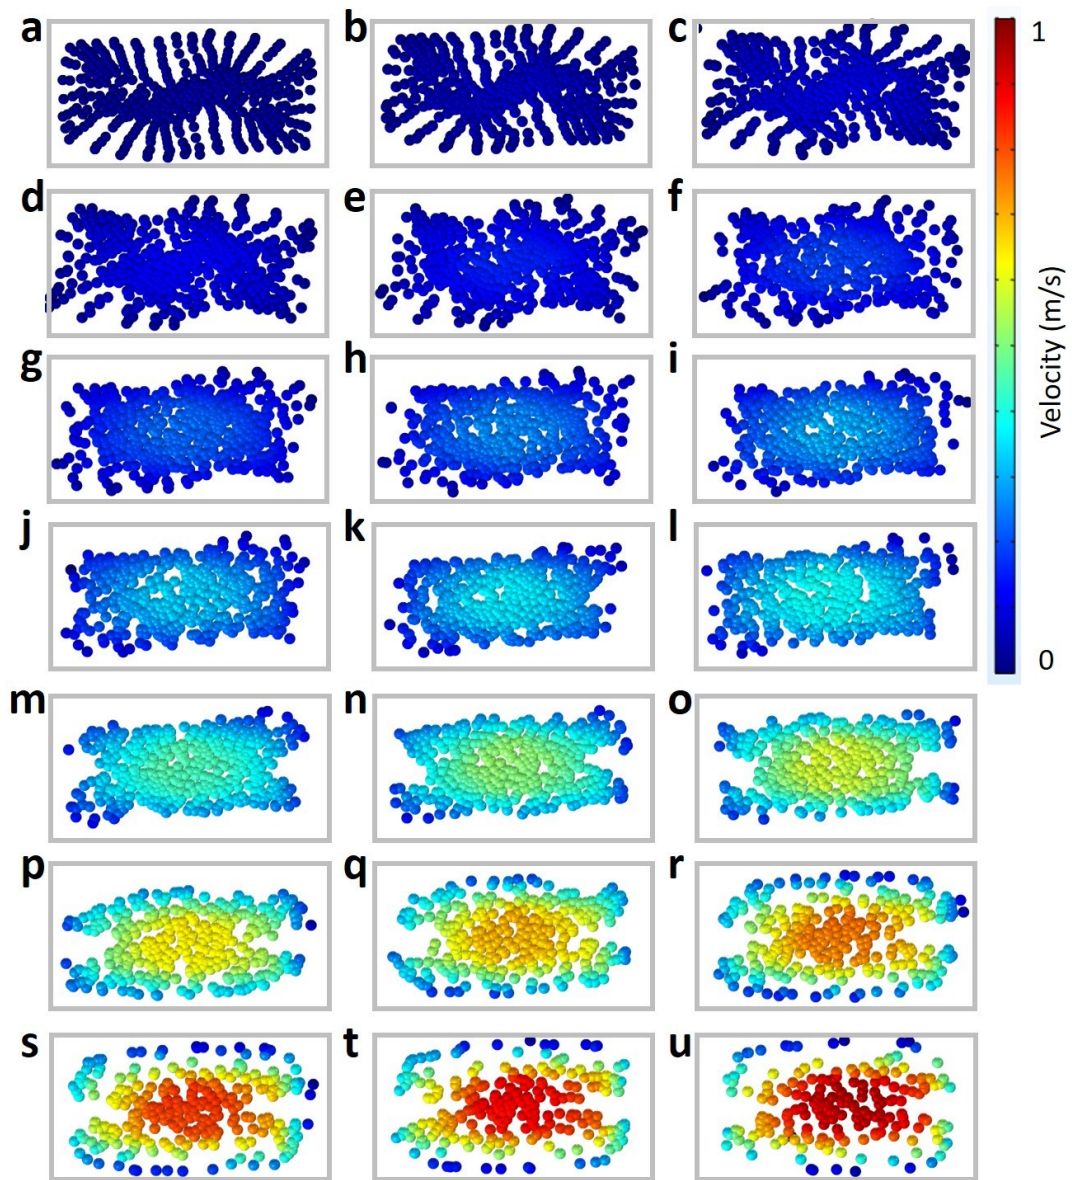

**Fig. S5.** The simulation results of different velocities (48  $\mu\text{L}/\text{min}$  – 2832  $\mu\text{L}/\text{min}$ ) in serpentine channel with the curvature of 5.5 mm. (a) 48  $\mu\text{L}/\text{min}$  (0.01 m/s), (b) 144  $\mu\text{L}/\text{min}$  (0.03 m/s), (c) 240  $\mu\text{L}/\text{min}$  (0.05 m/s), (d) 336  $\mu\text{L}/\text{min}$  (0.07 m/s), (e) 432  $\mu\text{L}/\text{min}$  (0.09 m/s), (f) 528  $\mu\text{L}/\text{min}$  (0.11 m/s), (g) 624  $\mu\text{L}/\text{min}$  (0.13 m/s), (h) 720  $\mu\text{L}/\text{min}$  (0.15 m/s), (i) 816  $\mu\text{L}/\text{min}$  (0.17 m/s), (j) 912  $\mu\text{L}/\text{min}$  (0.19 m/s), (k) 1008  $\mu\text{L}/\text{min}$  (0.21 m/s), (l) 1104  $\mu\text{L}/\text{min}$  (0.23 m/s), (m) 1296  $\mu\text{L}/\text{min}$  (0.27 m/s), (n) 1488  $\mu\text{L}/\text{min}$  (0.31 m/s), (o) 1680  $\mu\text{L}/\text{min}$  (0.35 m/s), (p) 1872  $\mu\text{L}/\text{min}$  (0.39 m/s), (q) 2064  $\mu\text{L}/\text{min}$  (0.43 m/s), (r) 2256  $\mu\text{L}/\text{min}$  (0.47 m/s), (s) 2448  $\mu\text{L}/\text{min}$  (0.51 m/s), (t) 2640  $\mu\text{L}/\text{min}$  (0.55 m/s), (u) 2832  $\mu\text{L}/\text{min}$  (0.59 m/s).



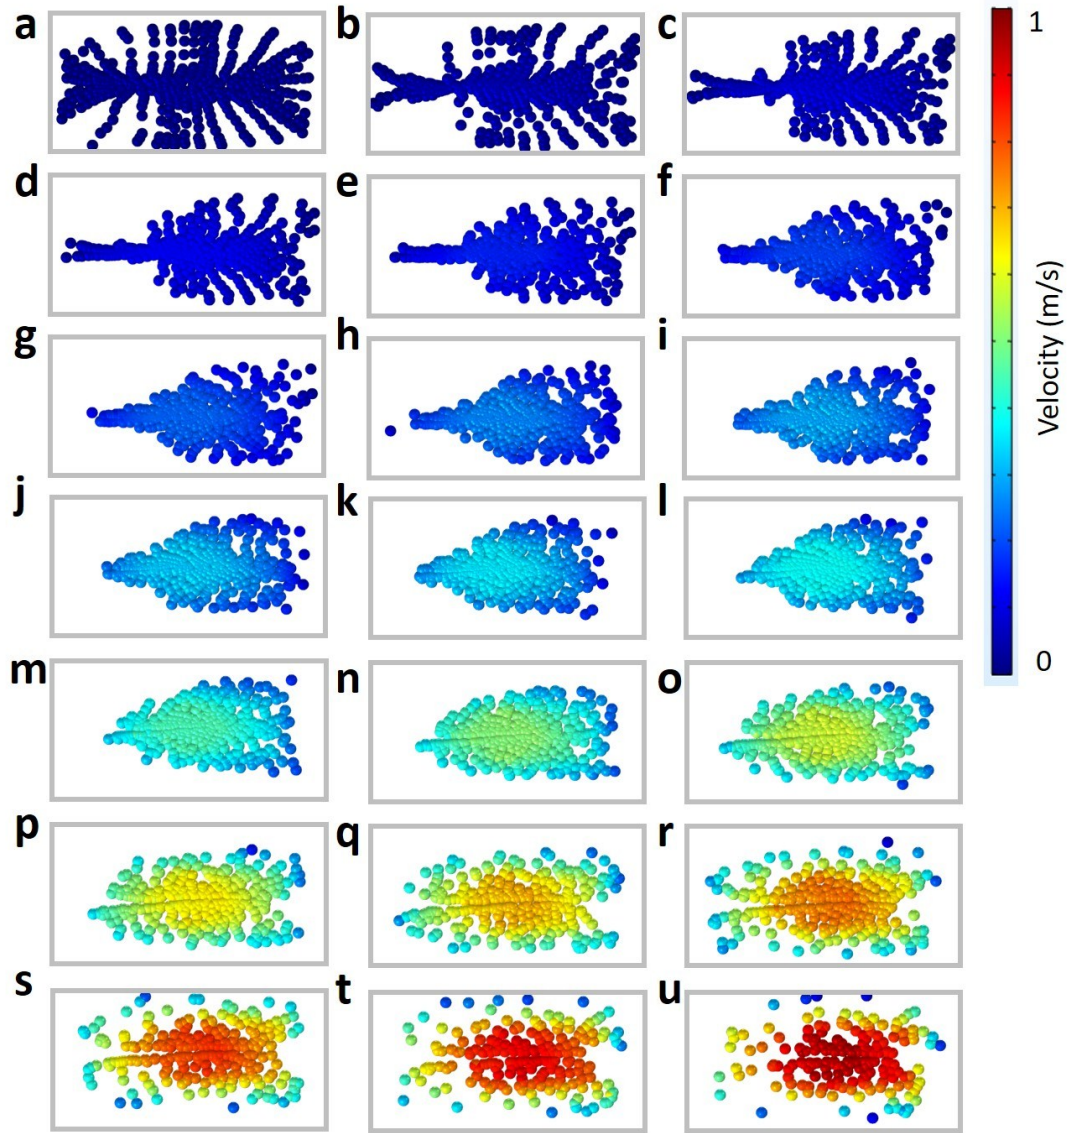

**Fig. S6.** The simulation results of different velocities (48  $\mu\text{L}/\text{min}$  – 2832  $\mu\text{L}/\text{min}$ ) in serpentine channel with the curvature of 5.6 mm. (a) 48  $\mu\text{L}/\text{min}$  (0.01 m/s), (b) 144  $\mu\text{L}/\text{min}$  (0.03 m/s), (c) 240  $\mu\text{L}/\text{min}$  (0.05 m/s), (d) 336  $\mu\text{L}/\text{min}$  (0.07 m/s), (e) 432  $\mu\text{L}/\text{min}$  (0.09 m/s), (f) 528  $\mu\text{L}/\text{min}$  (0.11 m/s), (g) 624  $\mu\text{L}/\text{min}$  (0.13 m/s), (h) 720  $\mu\text{L}/\text{min}$  (0.15 m/s), (i) 816  $\mu\text{L}/\text{min}$  (0.17 m/s), (j) 912  $\mu\text{L}/\text{min}$  (0.19 m/s), (k) 1008  $\mu\text{L}/\text{min}$  (0.21 m/s), (l) 1104  $\mu\text{L}/\text{min}$  (0.23 m/s), (m) 1296  $\mu\text{L}/\text{min}$  (0.27 m/s), (n) 1488  $\mu\text{L}/\text{min}$  (0.31 m/s), (o) 1680  $\mu\text{L}/\text{min}$  (0.35 m/s), (p) 1872  $\mu\text{L}/\text{min}$  (0.39 m/s), (q) 2064  $\mu\text{L}/\text{min}$  (0.43 m/s), (r) 2256  $\mu\text{L}/\text{min}$  (0.47 m/s), (s) 2448  $\mu\text{L}/\text{min}$  (0.51 m/s), (t) 2640  $\mu\text{L}/\text{min}$  (0.55 m/s), (u) 2832  $\mu\text{L}/\text{min}$  (0.59 m/s).

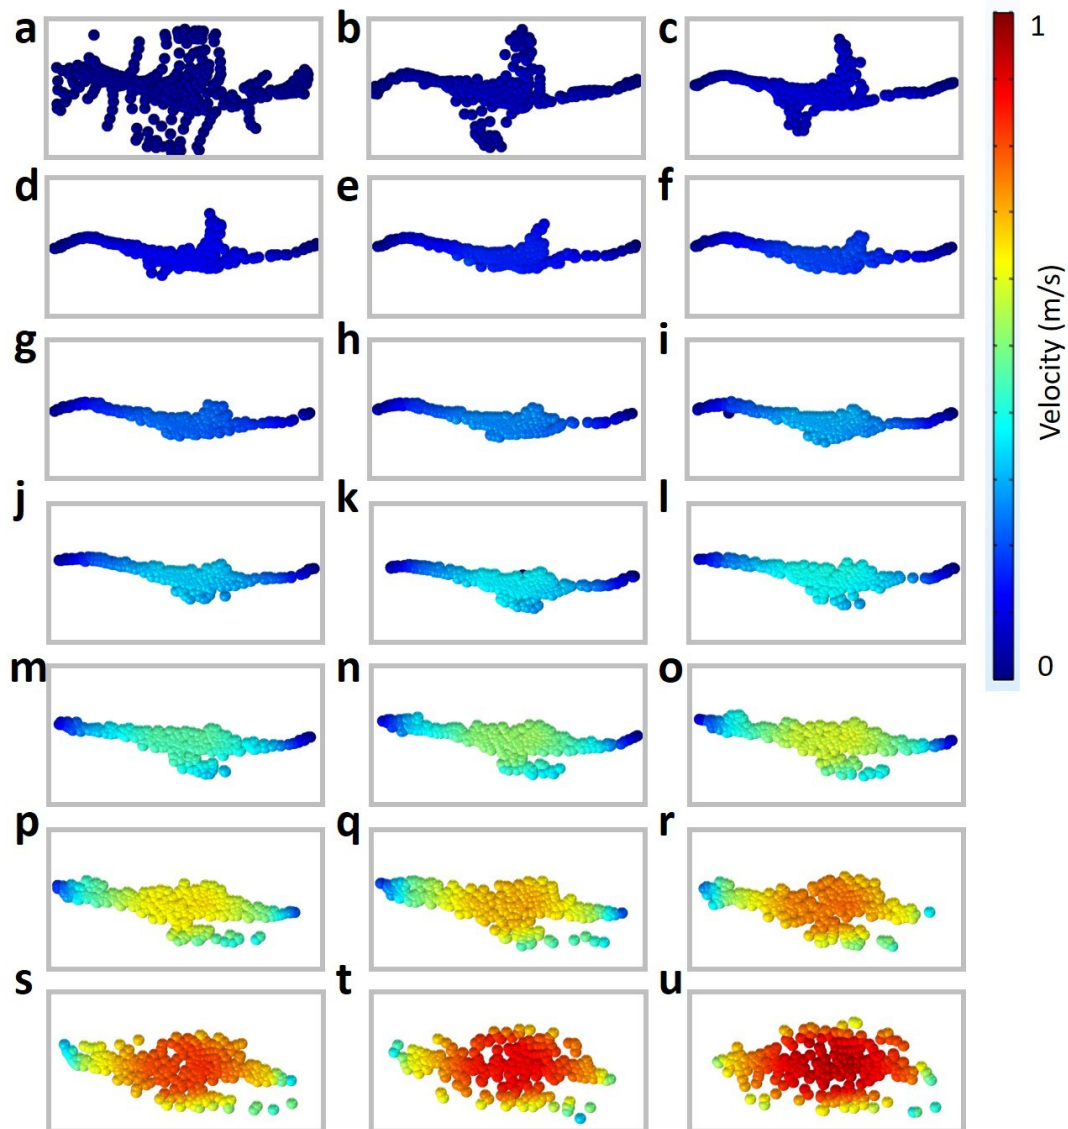

**Fig. S7.** The simulation results of different velocities (48  $\mu\text{L}/\text{min}$  – 2832  $\mu\text{L}/\text{min}$ ) in serpentine channel with the curvature of 5.8 mm. (a) 48  $\mu\text{L}/\text{min}$  (0.01 m/s), (b) 144  $\mu\text{L}/\text{min}$  (0.03 m/s), (c) 240  $\mu\text{L}/\text{min}$  (0.05 m/s), (d) 336  $\mu\text{L}/\text{min}$  (0.07 m/s), (e) 432  $\mu\text{L}/\text{min}$  (0.09 m/s), (f) 528  $\mu\text{L}/\text{min}$  (0.11 m/s), (g) 624  $\mu\text{L}/\text{min}$  (0.13 m/s), (h) 720  $\mu\text{L}/\text{min}$  (0.15 m/s), (i) 816  $\mu\text{L}/\text{min}$  (0.17 m/s), (j) 912  $\mu\text{L}/\text{min}$  (0.19 m/s), (k) 1008  $\mu\text{L}/\text{min}$  (0.21 m/s), (l) 1104  $\mu\text{L}/\text{min}$  (0.23 m/s), (m) 1296  $\mu\text{L}/\text{min}$  (0.27 m/s), (n) 1488  $\mu\text{L}/\text{min}$  (0.31 m/s), (o) 1680  $\mu\text{L}/\text{min}$  (0.35 m/s), (p) 1872  $\mu\text{L}/\text{min}$  (0.39 m/s), (q) 2064  $\mu\text{L}/\text{min}$  (0.43 m/s), (r) 2256  $\mu\text{L}/\text{min}$  (0.47 m/s), (s) 2448  $\mu\text{L}/\text{min}$  (0.51 m/s), (t) 2640  $\mu\text{L}/\text{min}$  (0.55 m/s), (u) 2832  $\mu\text{L}/\text{min}$  (0.59 m/s).



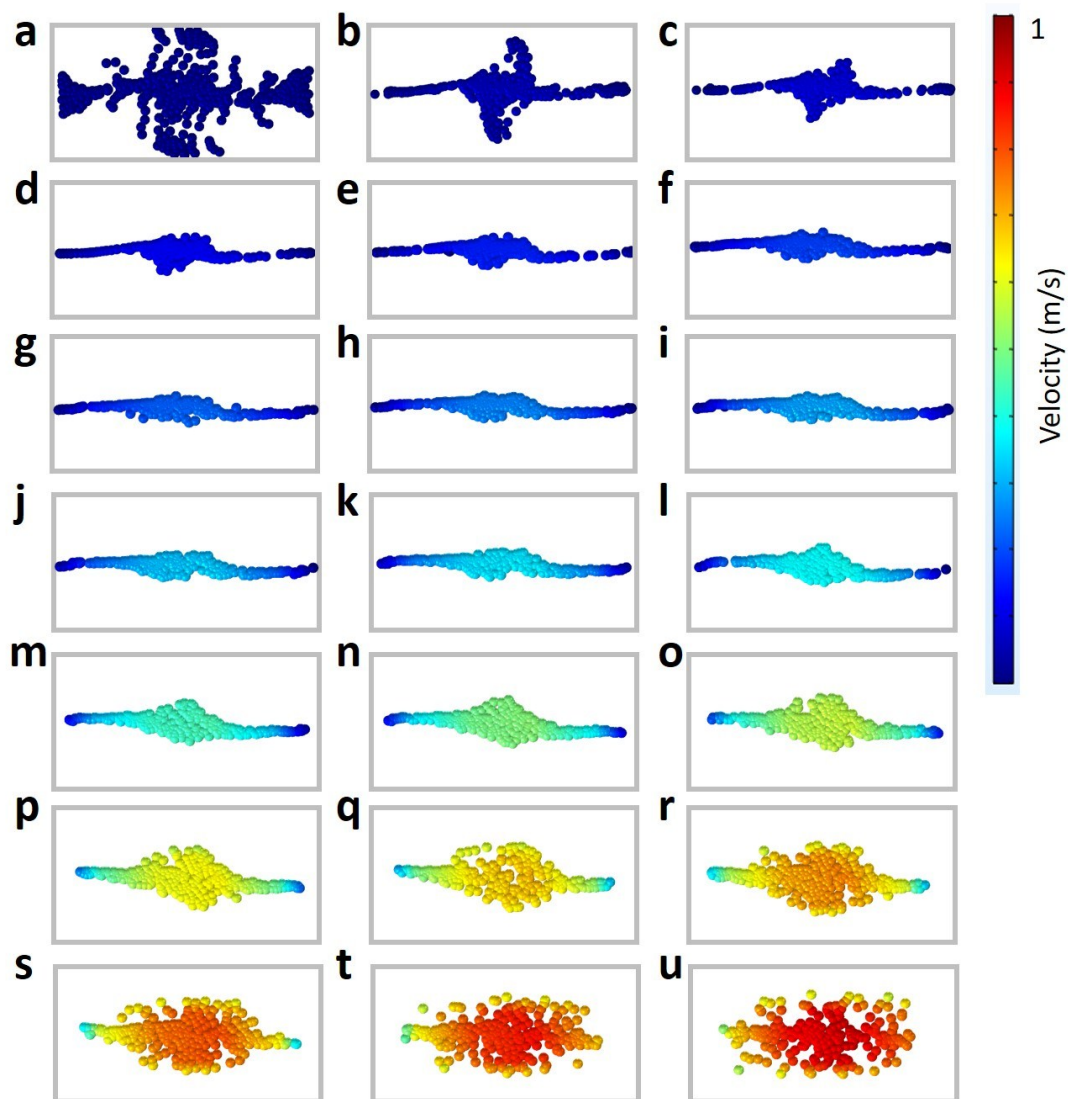

**Fig. S8.** The simulation results of different velocities (48  $\mu\text{L}/\text{min}$  – 2832  $\mu\text{L}/\text{min}$ ) in serpentine channel with the curvature of 5.9 mm. (a) 48  $\mu\text{L}/\text{min}$  (0.01 m/s), (b) 144  $\mu\text{L}/\text{min}$  (0.03 m/s), (c) 240  $\mu\text{L}/\text{min}$  (0.05 m/s), (d) 336  $\mu\text{L}/\text{min}$  (0.07 m/s), (e) 432  $\mu\text{L}/\text{min}$  (0.09 m/s), (f) 528  $\mu\text{L}/\text{min}$  (0.11 m/s), (g) 624  $\mu\text{L}/\text{min}$  (0.13 m/s), (h) 720  $\mu\text{L}/\text{min}$  (0.15 m/s), (i) 816  $\mu\text{L}/\text{min}$  (0.17 m/s), (j) 912  $\mu\text{L}/\text{min}$  (0.19 m/s), (k) 1008  $\mu\text{L}/\text{min}$  (0.21 m/s), (l) 1104  $\mu\text{L}/\text{min}$  (0.23 m/s), (m) 1296  $\mu\text{L}/\text{min}$  (0.27 m/s), (n) 1488  $\mu\text{L}/\text{min}$  (0.31 m/s), (o) 1680  $\mu\text{L}/\text{min}$  (0.35 m/s), (p) 1872  $\mu\text{L}/\text{min}$  (0.39 m/s), (q) 2064  $\mu\text{L}/\text{min}$  (0.43 m/s), (r) 2256  $\mu\text{L}/\text{min}$  (0.47 m/s), (s) 2448  $\mu\text{L}/\text{min}$  (0.51 m/s), (t) 2640  $\mu\text{L}/\text{min}$  (0.55 m/s), (u) 2832  $\mu\text{L}/\text{min}$  (0.59 m/s).

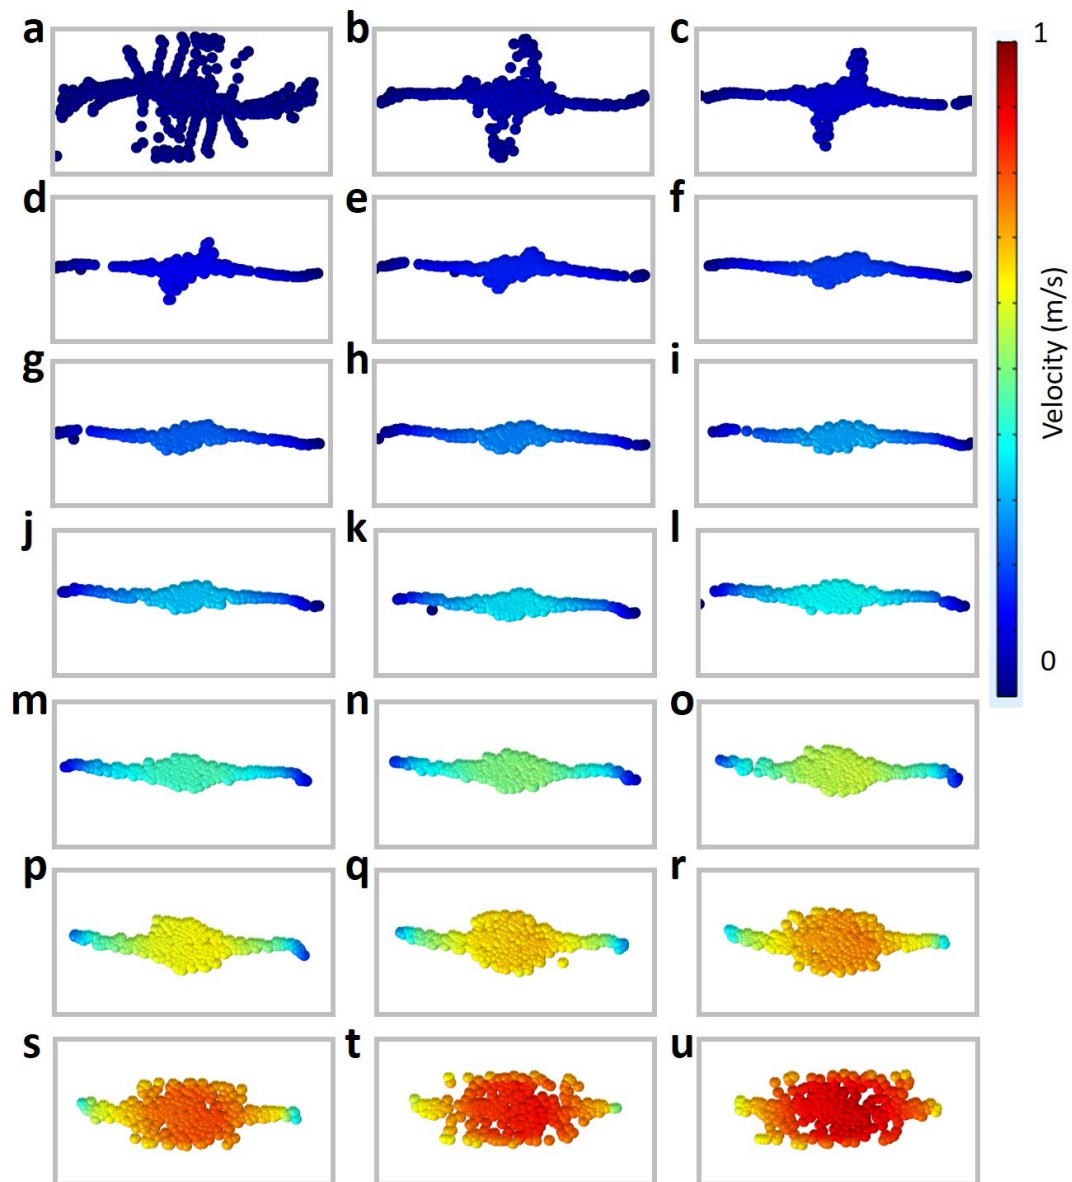

**Fig. S9.** The simulation results of different velocities (48  $\mu\text{L}/\text{min}$  – 2832  $\mu\text{L}/\text{min}$ ) in serpentine channel with the curvature of 6.0 mm. (a) 48  $\mu\text{L}/\text{min}$  (0.01 m/s), (b) 144  $\mu\text{L}/\text{min}$  (0.03 m/s), (c) 240  $\mu\text{L}/\text{min}$  (0.05 m/s), (d) 336  $\mu\text{L}/\text{min}$  (0.07 m/s), (e) 432  $\mu\text{L}/\text{min}$  (0.09 m/s), (f) 528  $\mu\text{L}/\text{min}$  (0.11 m/s), (g) 624  $\mu\text{L}/\text{min}$  (0.13 m/s), (h) 720  $\mu\text{L}/\text{min}$  (0.15 m/s), (i) 816  $\mu\text{L}/\text{min}$  (0.17 m/s), (j) 912  $\mu\text{L}/\text{min}$  (0.19 m/s), (k) 1008  $\mu\text{L}/\text{min}$  (0.21 m/s), (l) 1104  $\mu\text{L}/\text{min}$  (0.23 m/s), (m) 1296  $\mu\text{L}/\text{min}$  (0.27 m/s), (n) 1488  $\mu\text{L}/\text{min}$  (0.31 m/s), (o) 1680  $\mu\text{L}/\text{min}$  (0.35 m/s), (p) 1872  $\mu\text{L}/\text{min}$  (0.39 m/s), (q) 2064  $\mu\text{L}/\text{min}$  (0.43 m/s), (r) 2256  $\mu\text{L}/\text{min}$  (0.47 m/s), (s) 2448  $\mu\text{L}/\text{min}$  (0.51 m/s), (t) 2640  $\mu\text{L}/\text{min}$  (0.55 m/s), (u) 2832  $\mu\text{L}/\text{min}$  (0.59 m/s).

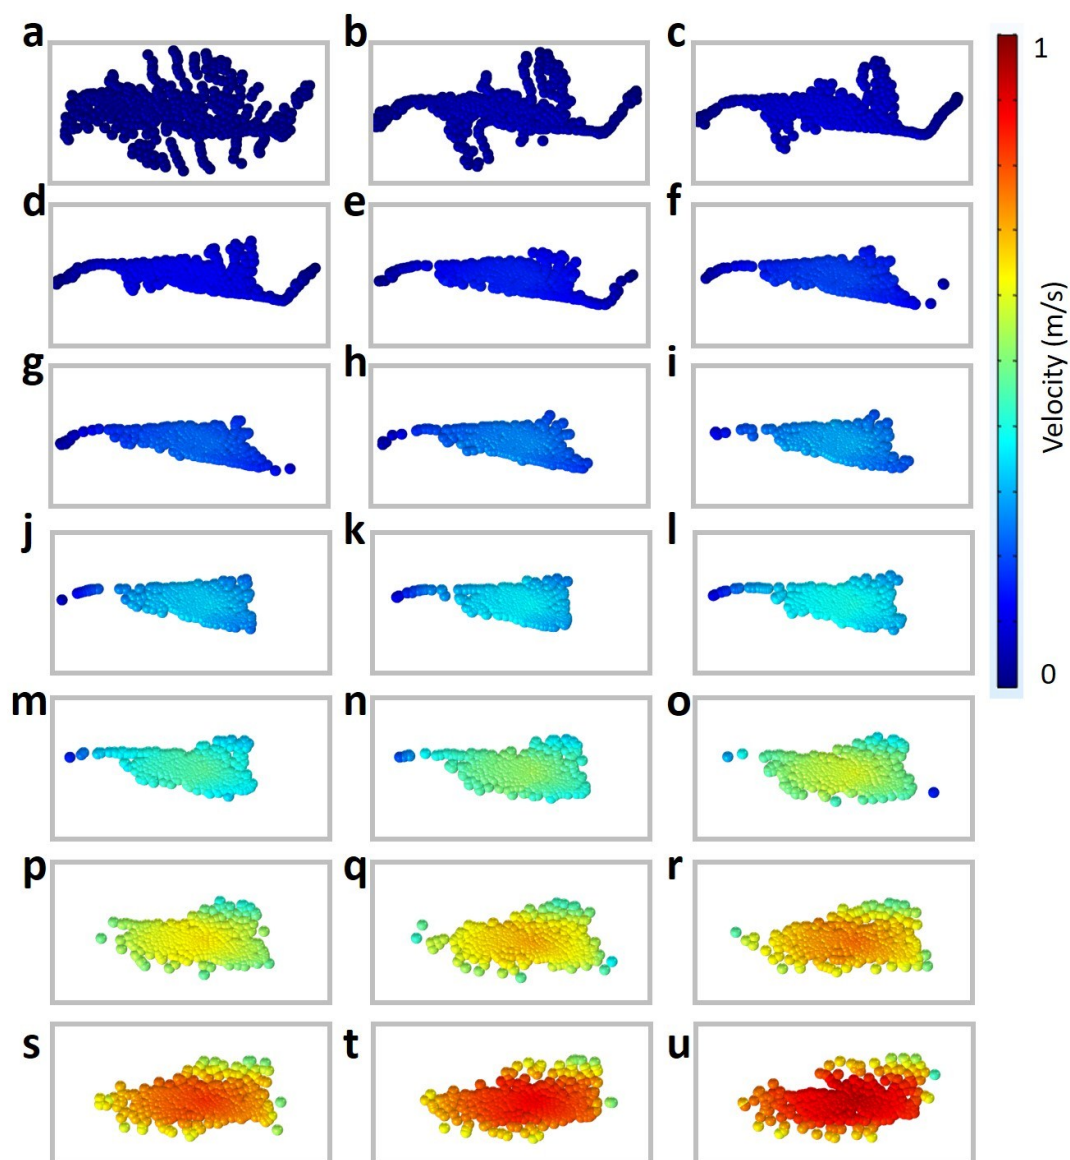

**Fig. S10.** The simulation results of different velocities (48  $\mu\text{L}/\text{min}$  – 2832  $\mu\text{L}/\text{min}$ ) in serpentine channel with the curvature of 6.2 mm. (a) 48  $\mu\text{L}/\text{min}$  (0.01 m/s), (b) 144  $\mu\text{L}/\text{min}$  (0.03 m/s), (c) 240  $\mu\text{L}/\text{min}$  (0.05 m/s), (d) 336  $\mu\text{L}/\text{min}$  (0.07 m/s), (e) 432  $\mu\text{L}/\text{min}$  (0.09 m/s), (f) 528  $\mu\text{L}/\text{min}$  (0.11 m/s), (g) 624  $\mu\text{L}/\text{min}$  (0.13 m/s), (h) 720  $\mu\text{L}/\text{min}$  (0.15 m/s), (i) 816  $\mu\text{L}/\text{min}$  (0.17 m/s), (j) 912  $\mu\text{L}/\text{min}$  (0.19 m/s), (k) 1008  $\mu\text{L}/\text{min}$  (0.21 m/s), (l) 1104  $\mu\text{L}/\text{min}$  (0.23 m/s), (m) 1296  $\mu\text{L}/\text{min}$  (0.27 m/s), (n) 1488  $\mu\text{L}/\text{min}$  (0.31 m/s), (o) 1680  $\mu\text{L}/\text{min}$  (0.35 m/s), (p) 1872  $\mu\text{L}/\text{min}$  (0.39 m/s), (q) 2064  $\mu\text{L}/\text{min}$  (0.43 m/s), (r) 2256  $\mu\text{L}/\text{min}$  (0.47 m/s), (s) 2448  $\mu\text{L}/\text{min}$  (0.51 m/s), (t) 2640  $\mu\text{L}/\text{min}$  (0.55 m/s), (u) 2832  $\mu\text{L}/\text{min}$  (0.59 m/s).



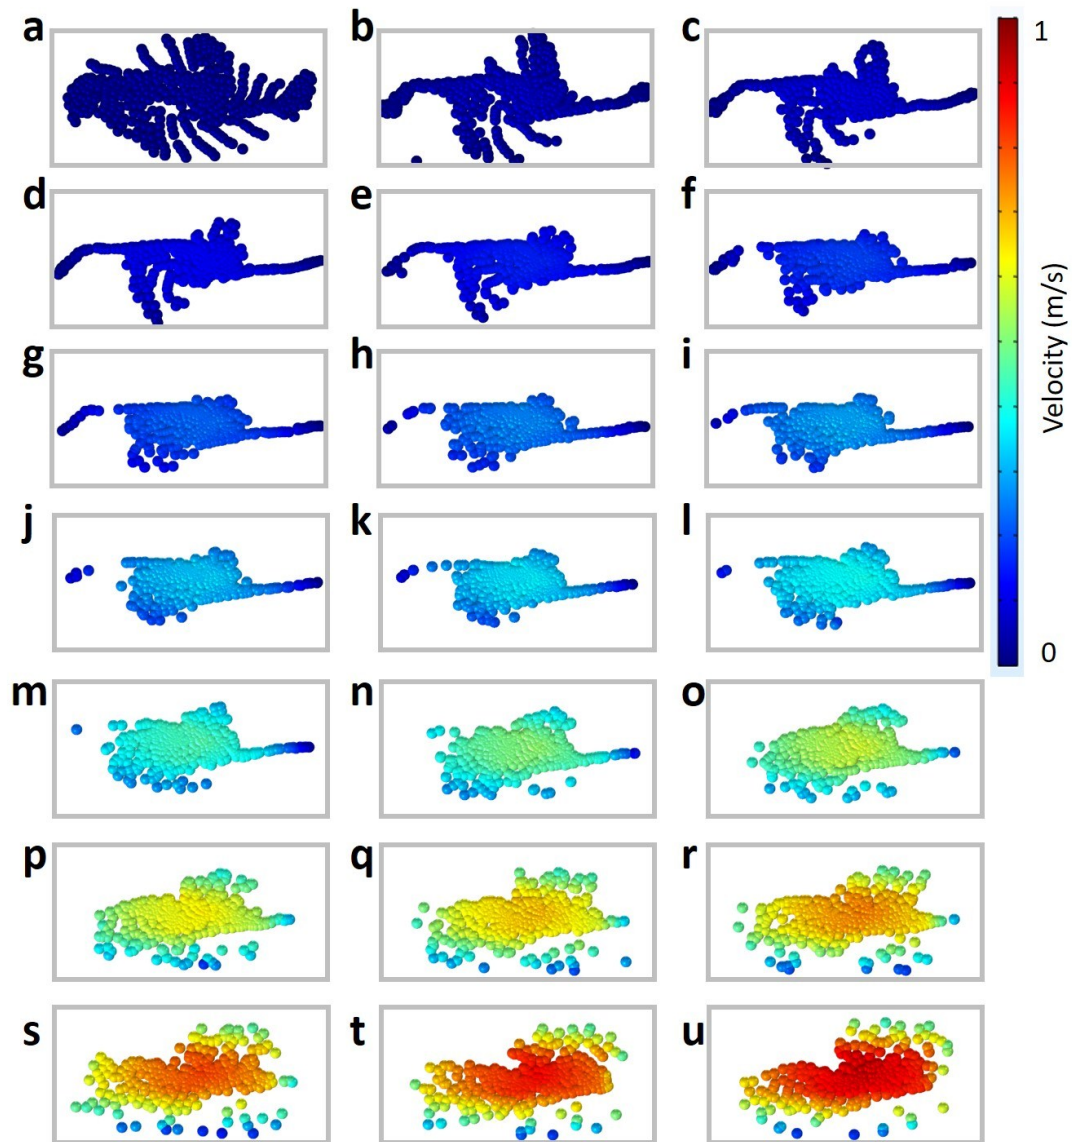

**Fig. S11.** The simulation results of different velocities (48  $\mu\text{L}/\text{min}$  – 2832  $\mu\text{L}/\text{min}$ ) in serpentine channel with the curvature of 6.4 mm. (a) 48  $\mu\text{L}/\text{min}$  (0.01 m/s), (b) 144  $\mu\text{L}/\text{min}$  (0.03 m/s), (c) 240  $\mu\text{L}/\text{min}$  (0.05 m/s), (d) 336  $\mu\text{L}/\text{min}$  (0.07 m/s), (e) 432  $\mu\text{L}/\text{min}$  (0.09 m/s), (f) 528  $\mu\text{L}/\text{min}$  (0.11 m/s), (g) 624  $\mu\text{L}/\text{min}$  (0.13 m/s), (h) 720  $\mu\text{L}/\text{min}$  (0.15 m/s), (i) 816  $\mu\text{L}/\text{min}$  (0.17 m/s), (j) 912  $\mu\text{L}/\text{min}$  (0.19 m/s), (k) 1008  $\mu\text{L}/\text{min}$  (0.21 m/s), (l) 1104  $\mu\text{L}/\text{min}$  (0.23 m/s), (m) 1296  $\mu\text{L}/\text{min}$  (0.27 m/s), (n) 1488  $\mu\text{L}/\text{min}$  (0.31 m/s), (o) 1680  $\mu\text{L}/\text{min}$  (0.35 m/s), (p) 1872  $\mu\text{L}/\text{min}$  (0.39 m/s), (q) 2064  $\mu\text{L}/\text{min}$  (0.43 m/s), (r) 2256  $\mu\text{L}/\text{min}$  (0.47 m/s), (s) 2448  $\mu\text{L}/\text{min}$  (0.51 m/s), (t) 2640  $\mu\text{L}/\text{min}$  (0.55 m/s), (u) 2832  $\mu\text{L}/\text{min}$  (0.59 m/s).

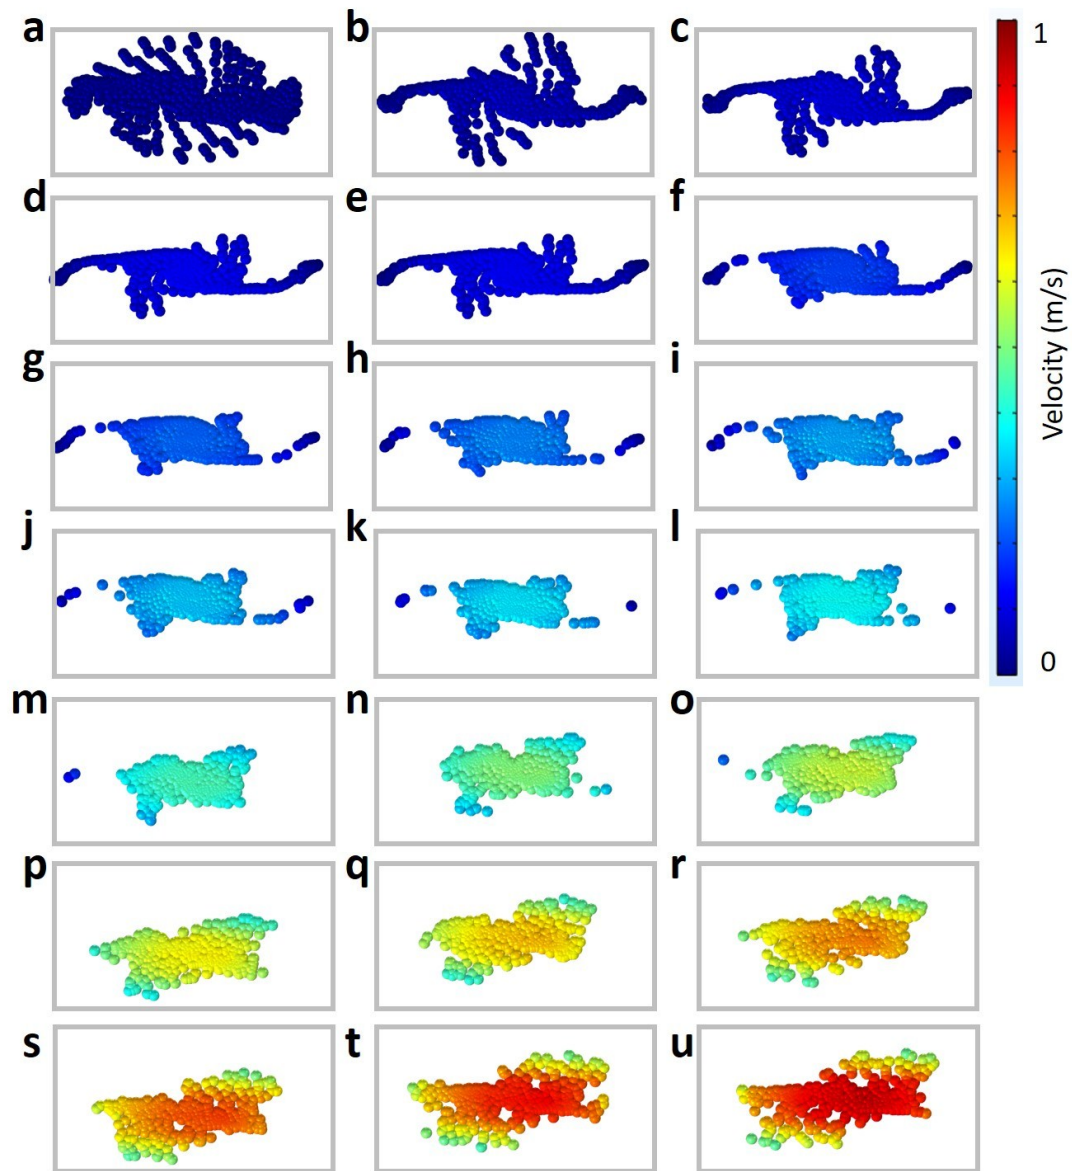

**Fig. S12.** The simulation results of different velocities (48  $\mu\text{L}/\text{min}$  – 2832  $\mu\text{L}/\text{min}$ ) in serpentine channel with the curvature of 6.5 mm. (a) 48  $\mu\text{L}/\text{min}$  (0.01 m/s), (b) 144  $\mu\text{L}/\text{min}$  (0.03 m/s), (c) 240  $\mu\text{L}/\text{min}$  (0.05 m/s), (d) 336  $\mu\text{L}/\text{min}$  (0.07 m/s), (e) 432  $\mu\text{L}/\text{min}$  (0.09 m/s), (f) 528  $\mu\text{L}/\text{min}$  (0.11 m/s), (g) 624  $\mu\text{L}/\text{min}$  (0.13 m/s), (h) 720  $\mu\text{L}/\text{min}$  (0.15 m/s), (i) 816  $\mu\text{L}/\text{min}$  (0.17 m/s), (j) 912  $\mu\text{L}/\text{min}$  (0.19 m/s), (k) 1008  $\mu\text{L}/\text{min}$  (0.21 m/s), (l) 1104  $\mu\text{L}/\text{min}$  (0.23 m/s), (m) 1296  $\mu\text{L}/\text{min}$  (0.27 m/s), (n) 1488  $\mu\text{L}/\text{min}$  (0.31 m/s), (o) 1680  $\mu\text{L}/\text{min}$  (0.35 m/s), (p) 1872  $\mu\text{L}/\text{min}$  (0.39 m/s), (q) 2064  $\mu\text{L}/\text{min}$  (0.43 m/s), (r) 2256  $\mu\text{L}/\text{min}$  (0.47 m/s), (s) 2448  $\mu\text{L}/\text{min}$  (0.51 m/s), (t) 2640  $\mu\text{L}/\text{min}$  (0.55 m/s), (u) 2832  $\mu\text{L}/\text{min}$  (0.59 m/s).

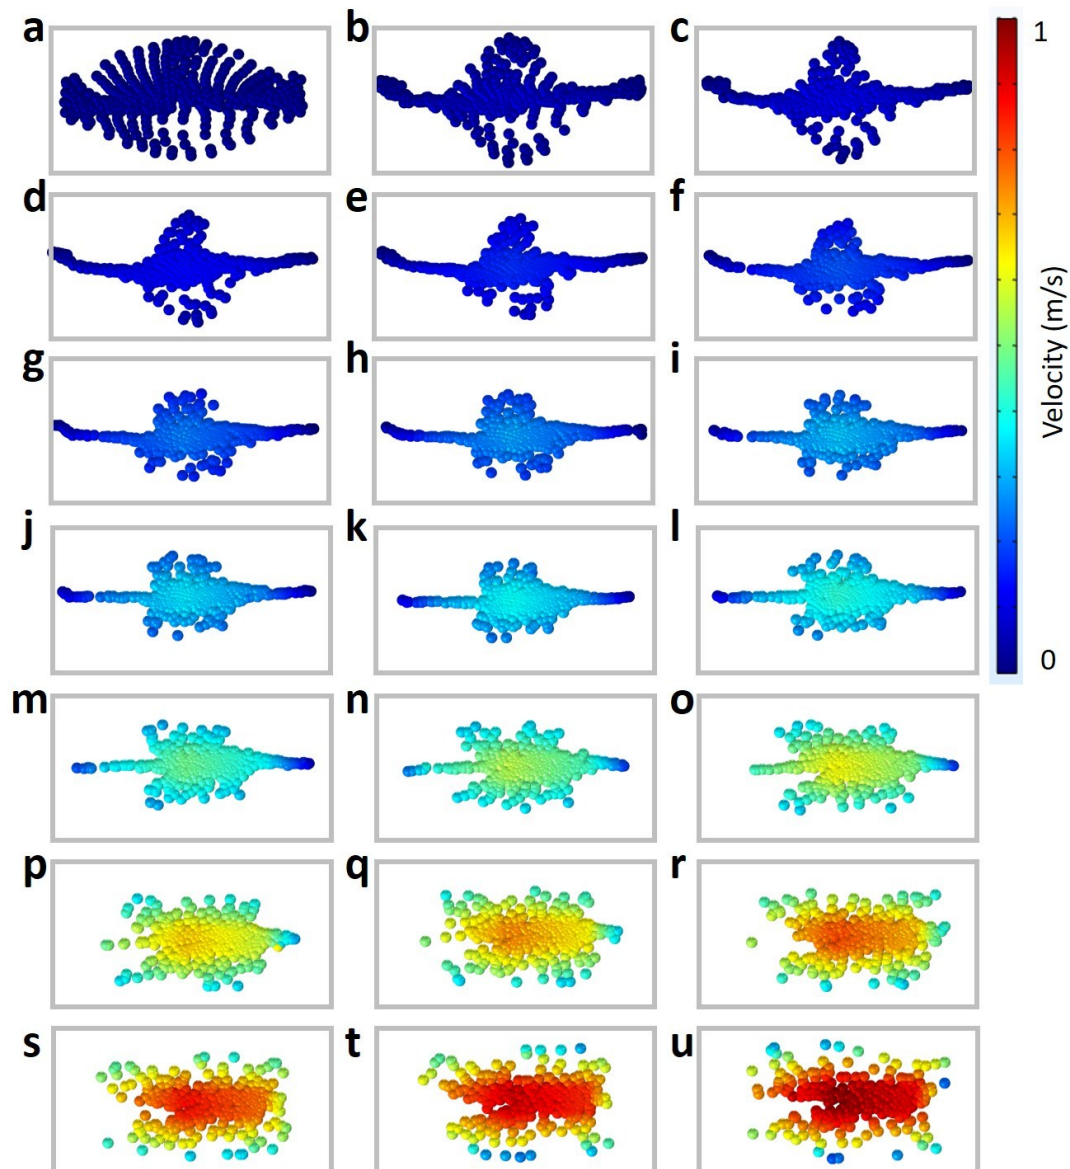

**Fig. S13.** The simulation results of different velocities (48  $\mu\text{L}/\text{min}$  – 2832  $\mu\text{L}/\text{min}$ ) in serpentine channel with the curvature of 6.6 mm. (a) 48  $\mu\text{L}/\text{min}$  (0.01 m/s), (b) 144  $\mu\text{L}/\text{min}$  (0.03 m/s), (c) 240  $\mu\text{L}/\text{min}$  (0.05 m/s), (d) 336  $\mu\text{L}/\text{min}$  (0.07 m/s), (e) 432  $\mu\text{L}/\text{min}$  (0.09 m/s), (f) 528  $\mu\text{L}/\text{min}$  (0.11 m/s), (g) 624  $\mu\text{L}/\text{min}$  (0.13 m/s), (h) 720  $\mu\text{L}/\text{min}$  (0.15 m/s), (i) 816  $\mu\text{L}/\text{min}$  (0.17 m/s), (j) 912  $\mu\text{L}/\text{min}$  (0.19 m/s), (k) 1008  $\mu\text{L}/\text{min}$  (0.21 m/s), (l) 1104  $\mu\text{L}/\text{min}$  (0.23 m/s), (m) 1296  $\mu\text{L}/\text{min}$  (0.27 m/s), (n) 1488  $\mu\text{L}/\text{min}$  (0.31 m/s), (o) 1680  $\mu\text{L}/\text{min}$  (0.35 m/s), (p) 1872  $\mu\text{L}/\text{min}$  (0.39 m/s), (q) 2064  $\mu\text{L}/\text{min}$  (0.43 m/s), (r) 2256  $\mu\text{L}/\text{min}$  (0.47 m/s), (s) 2448  $\mu\text{L}/\text{min}$  (0.51 m/s), (t) 2640  $\mu\text{L}/\text{min}$  (0.55 m/s), (u) 2832  $\mu\text{L}/\text{min}$  (0.59 m/s).



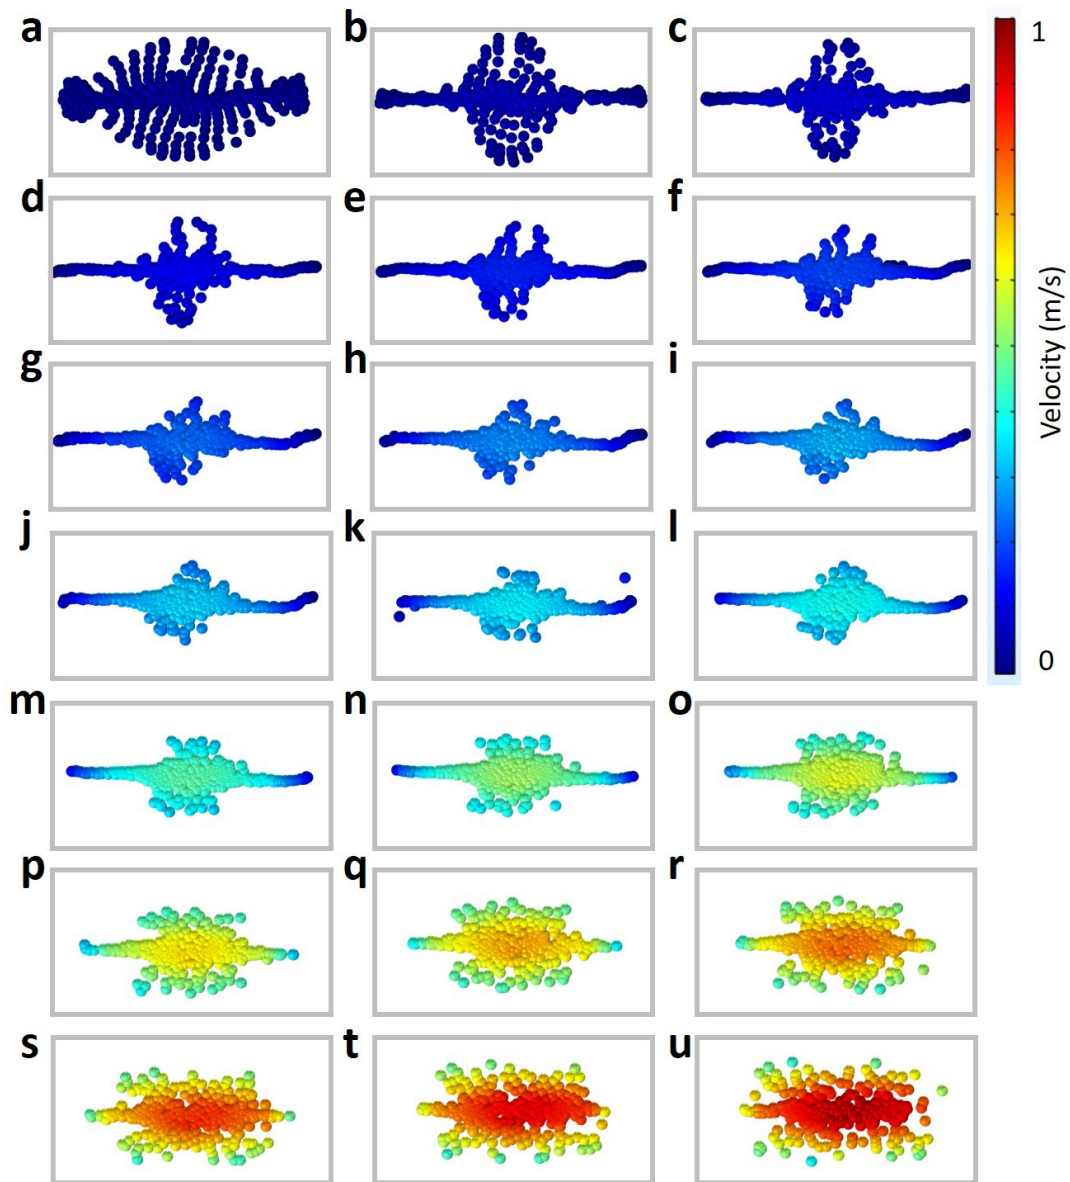

**Fig. S14.** The simulation results of different velocities (48  $\mu\text{L}/\text{min}$  – 2832  $\mu\text{L}/\text{min}$ ) in serpentine channel with the curvature of 7.0 mm. (a) 48  $\mu\text{L}/\text{min}$  (0.01 m/s), (b) 144  $\mu\text{L}/\text{min}$  (0.03 m/s), (c) 240  $\mu\text{L}/\text{min}$  (0.05 m/s), (d) 336  $\mu\text{L}/\text{min}$  (0.07 m/s), (e) 432  $\mu\text{L}/\text{min}$  (0.09 m/s), (f) 528  $\mu\text{L}/\text{min}$  (0.11 m/s), (g) 624  $\mu\text{L}/\text{min}$  (0.13 m/s), (h) 720  $\mu\text{L}/\text{min}$  (0.15 m/s), (i) 816  $\mu\text{L}/\text{min}$  (0.17 m/s), (j) 912  $\mu\text{L}/\text{min}$  (0.19 m/s), (k) 1008  $\mu\text{L}/\text{min}$  (0.21 m/s), (l) 1104  $\mu\text{L}/\text{min}$  (0.23 m/s), (m) 1296  $\mu\text{L}/\text{min}$  (0.27 m/s), (n) 1488  $\mu\text{L}/\text{min}$  (0.31 m/s), (o) 1680  $\mu\text{L}/\text{min}$  (0.35 m/s), (p) 1872  $\mu\text{L}/\text{min}$  (0.39 m/s), (q) 2064  $\mu\text{L}/\text{min}$  (0.43 m/s), (r) 2256  $\mu\text{L}/\text{min}$  (0.47 m/s), (s) 2448  $\mu\text{L}/\text{min}$  (0.51 m/s), (t) 2640  $\mu\text{L}/\text{min}$  (0.55 m/s), (u) 2832  $\mu\text{L}/\text{min}$  (0.59 m/s).

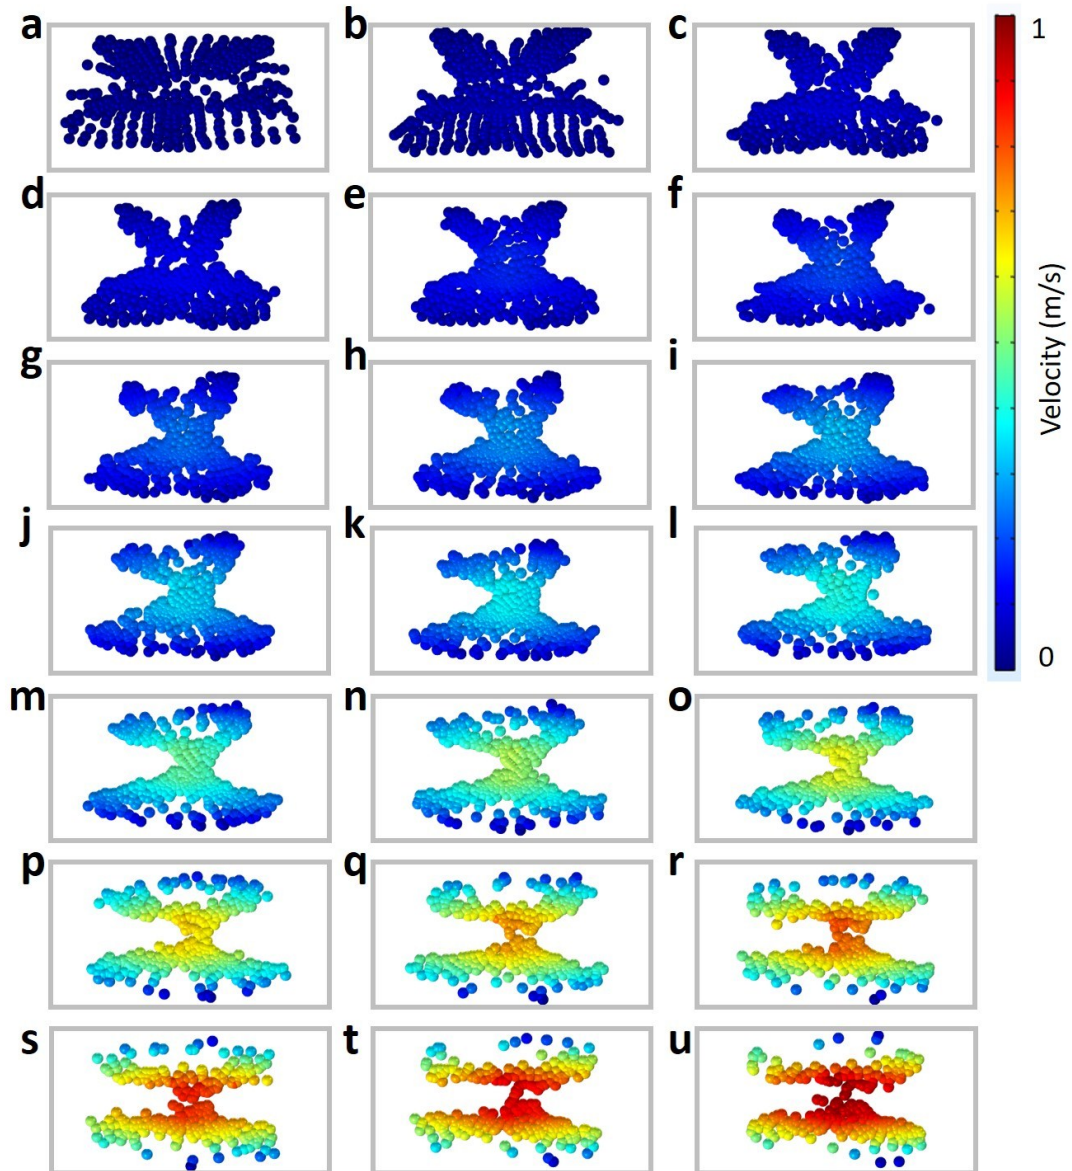

**Fig. S15.** The simulation results of different velocities (48  $\mu\text{L}/\text{min}$  – 2832  $\mu\text{L}/\text{min}$ ) in serpentine channel with the curvature of 7.5 mm. (a) 48  $\mu\text{L}/\text{min}$  (0.01 m/s), (b) 144  $\mu\text{L}/\text{min}$  (0.03 m/s), (c) 240  $\mu\text{L}/\text{min}$  (0.05 m/s), (d) 336  $\mu\text{L}/\text{min}$  (0.07 m/s), (e) 432  $\mu\text{L}/\text{min}$  (0.09 m/s), (f) 528  $\mu\text{L}/\text{min}$  (0.11 m/s), (g) 624  $\mu\text{L}/\text{min}$  (0.13 m/s), (h) 720  $\mu\text{L}/\text{min}$  (0.15 m/s), (i) 816  $\mu\text{L}/\text{min}$  (0.17 m/s), (j) 912  $\mu\text{L}/\text{min}$  (0.19 m/s), (k) 1008  $\mu\text{L}/\text{min}$  (0.21 m/s), (l) 1104  $\mu\text{L}/\text{min}$  (0.23 m/s), (m) 1296  $\mu\text{L}/\text{min}$  (0.27 m/s), (n) 1488  $\mu\text{L}/\text{min}$  (0.31 m/s), (o) 1680  $\mu\text{L}/\text{min}$  (0.35 m/s), (p) 1872  $\mu\text{L}/\text{min}$  (0.39 m/s), (q) 2064  $\mu\text{L}/\text{min}$  (0.43 m/s), (r) 2256  $\mu\text{L}/\text{min}$  (0.47 m/s), (s) 2448  $\mu\text{L}/\text{min}$  (0.51 m/s), (t) 2640  $\mu\text{L}/\text{min}$  (0.55 m/s), (u) 2832  $\mu\text{L}/\text{min}$  (0.59 m/s).

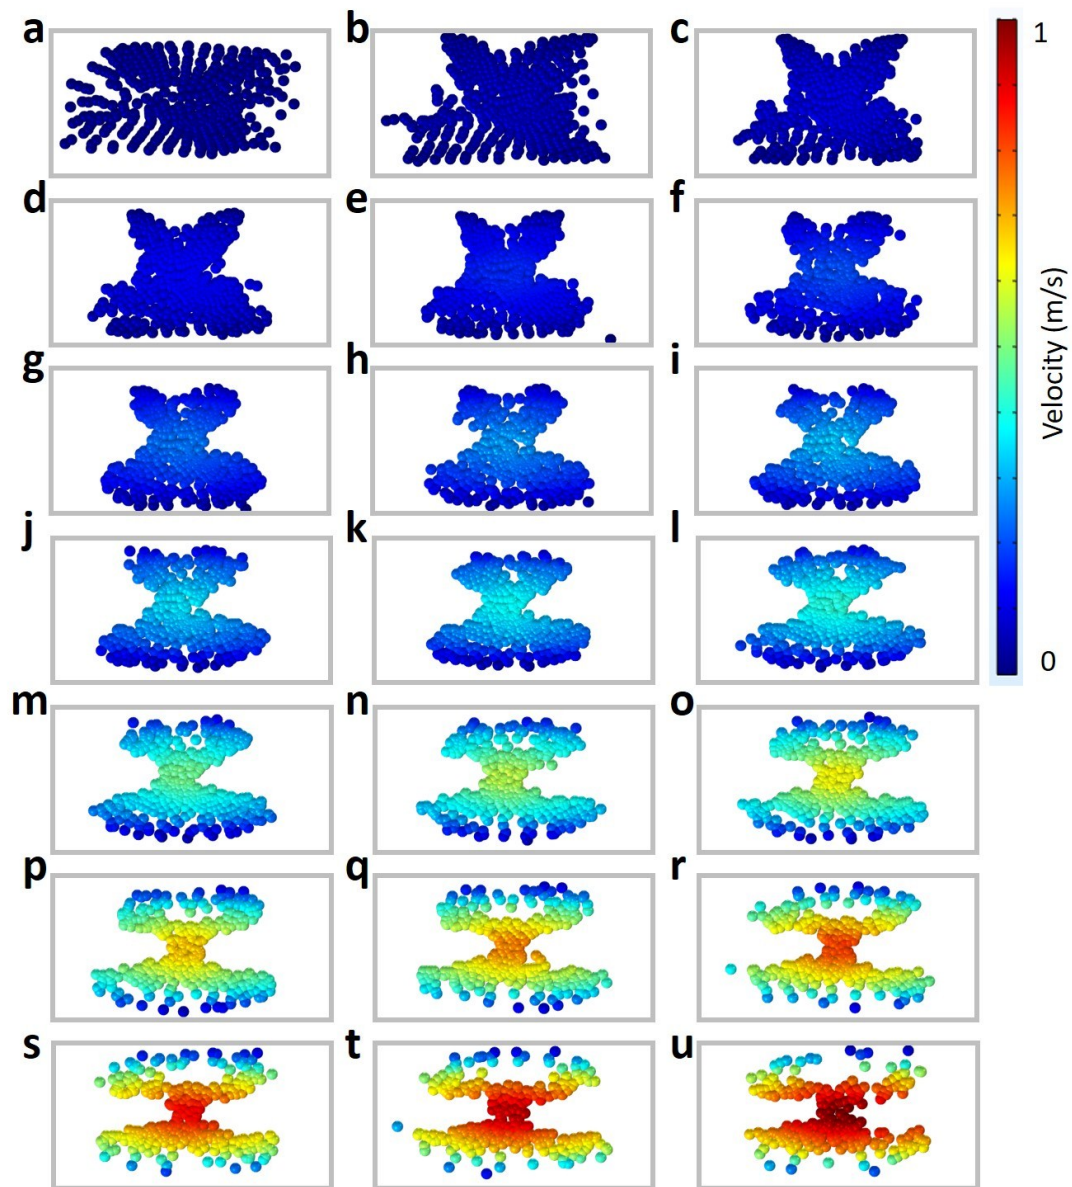

**Fig. S16.** The simulation results of different velocities (48  $\mu\text{L}/\text{min}$  – 2832  $\mu\text{L}/\text{min}$ ) in serpentine channel with the curvature of 8.0 mm. (a) 48  $\mu\text{L}/\text{min}$  (0.01 m/s), (b) 144  $\mu\text{L}/\text{min}$  (0.03 m/s), (c) 240  $\mu\text{L}/\text{min}$  (0.05 m/s), (d) 336  $\mu\text{L}/\text{min}$  (0.07 m/s), (e) 432  $\mu\text{L}/\text{min}$  (0.09 m/s), (f) 528  $\mu\text{L}/\text{min}$  (0.11 m/s), (g) 624  $\mu\text{L}/\text{min}$  (0.13 m/s), (h) 720  $\mu\text{L}/\text{min}$  (0.15 m/s), (i) 816  $\mu\text{L}/\text{min}$  (0.17 m/s), (j) 912  $\mu\text{L}/\text{min}$  (0.19 m/s), (k) 1008  $\mu\text{L}/\text{min}$  (0.21 m/s), (l) 1104  $\mu\text{L}/\text{min}$  (0.23 m/s), (m) 1296  $\mu\text{L}/\text{min}$  (0.27 m/s), (n) 1488  $\mu\text{L}/\text{min}$  (0.31 m/s), (o) 1680  $\mu\text{L}/\text{min}$  (0.35 m/s), (p) 1872  $\mu\text{L}/\text{min}$  (0.39 m/s), (q) 2064  $\mu\text{L}/\text{min}$  (0.43 m/s), (r) 2256  $\mu\text{L}/\text{min}$  (0.47 m/s), (s) 2448  $\mu\text{L}/\text{min}$  (0.51 m/s), (t) 2640  $\mu\text{L}/\text{min}$  (0.55 m/s), (u) 2832  $\mu\text{L}/\text{min}$  (0.59 m/s).



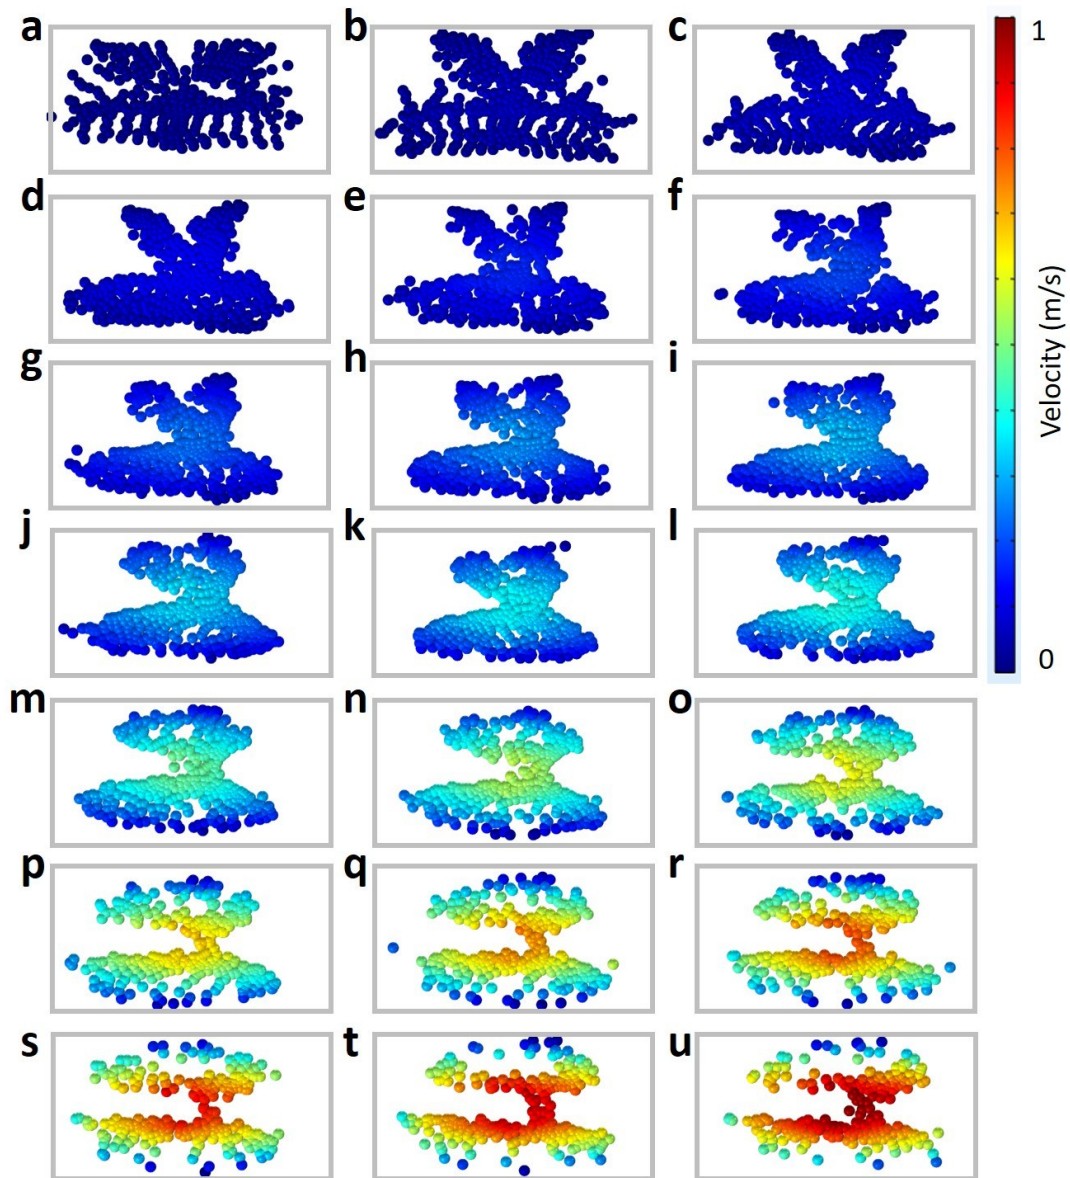

**Fig. S17.** The simulation results of different velocities (48  $\mu\text{L}/\text{min}$  – 2832  $\mu\text{L}/\text{min}$ ) in serpentine channel with the curvature of 8.5 mm. (a) 48  $\mu\text{L}/\text{min}$  (0.01 m/s), (b) 144  $\mu\text{L}/\text{min}$  (0.03 m/s), (c) 240  $\mu\text{L}/\text{min}$  (0.05 m/s), (d) 336  $\mu\text{L}/\text{min}$  (0.07 m/s), (e) 432  $\mu\text{L}/\text{min}$  (0.09 m/s), (f) 528  $\mu\text{L}/\text{min}$  (0.11 m/s), (g) 624  $\mu\text{L}/\text{min}$  (0.13 m/s), (h) 720  $\mu\text{L}/\text{min}$  (0.15 m/s), (i) 816  $\mu\text{L}/\text{min}$  (0.17 m/s), (j) 912  $\mu\text{L}/\text{min}$  (0.19 m/s), (k) 1008  $\mu\text{L}/\text{min}$  (0.21 m/s), (l) 1104  $\mu\text{L}/\text{min}$  (0.23 m/s), (m) 1296  $\mu\text{L}/\text{min}$  (0.27 m/s), (n) 1488  $\mu\text{L}/\text{min}$  (0.31 m/s), (o) 1680  $\mu\text{L}/\text{min}$  (0.35 m/s), (p) 1872  $\mu\text{L}/\text{min}$  (0.39 m/s), (q) 2064  $\mu\text{L}/\text{min}$  (0.43 m/s), (r) 2256  $\mu\text{L}/\text{min}$  (0.47 m/s), (s) 2448  $\mu\text{L}/\text{min}$  (0.51 m/s), (t) 2640  $\mu\text{L}/\text{min}$  (0.55 m/s), (u) 2832  $\mu\text{L}/\text{min}$  (0.59 m/s).

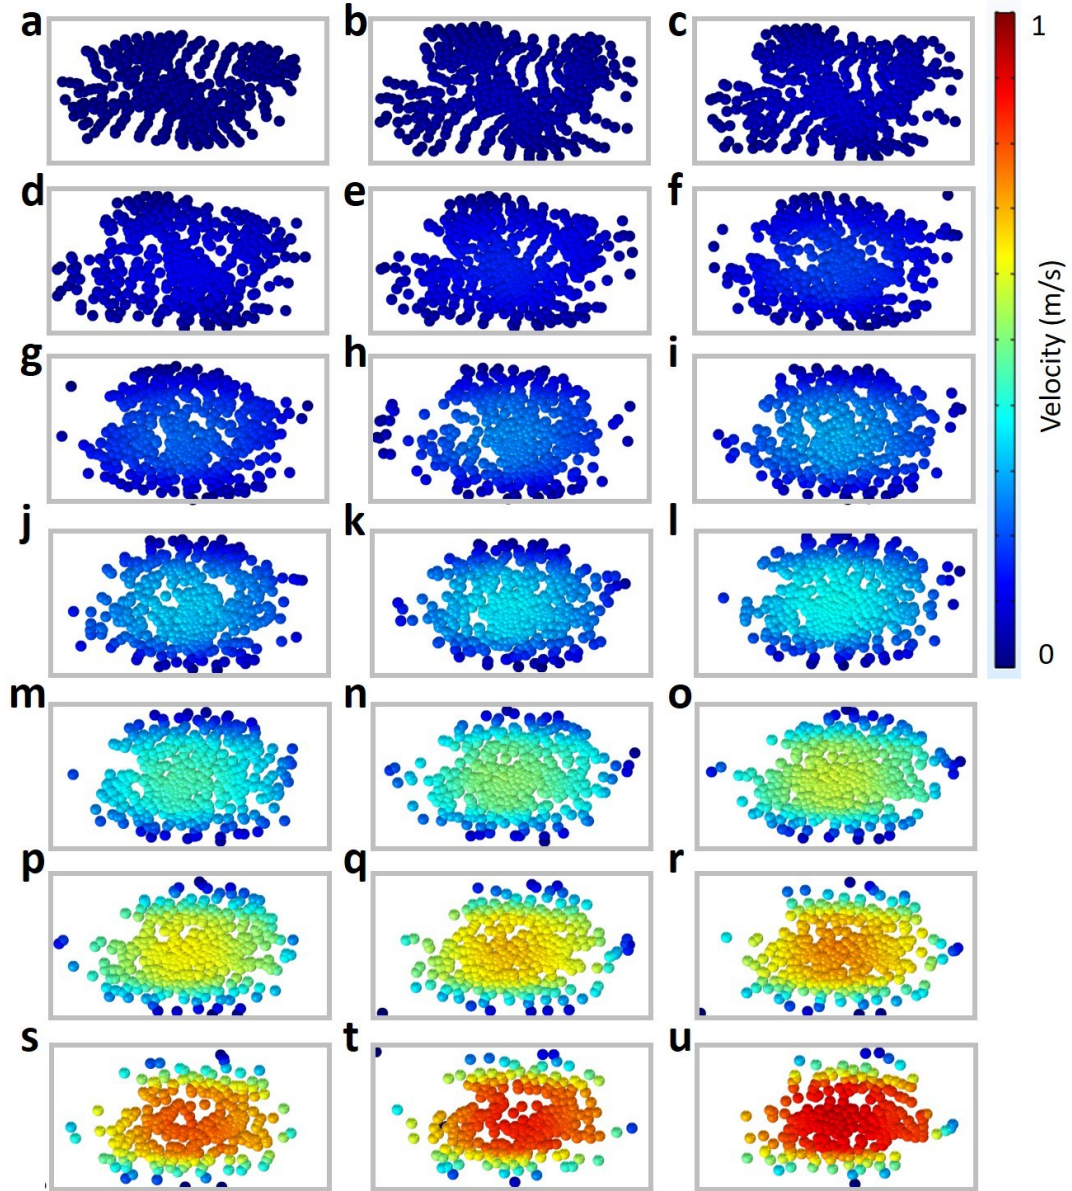

**Fig. S18.** The simulation results of different velocities (48  $\mu\text{L}/\text{min}$  – 2832  $\mu\text{L}/\text{min}$ ) in serpentine channel with the curvature of 9.0 mm. (a) 48  $\mu\text{L}/\text{min}$  (0.01 m/s), (b) 144  $\mu\text{L}/\text{min}$  (0.03 m/s), (c) 240  $\mu\text{L}/\text{min}$  (0.05 m/s), (d) 336  $\mu\text{L}/\text{min}$  (0.07 m/s), (e) 432  $\mu\text{L}/\text{min}$  (0.09 m/s), (f) 528  $\mu\text{L}/\text{min}$  (0.11 m/s), (g) 624  $\mu\text{L}/\text{min}$  (0.13 m/s), (h) 720  $\mu\text{L}/\text{min}$  (0.15 m/s), (i) 816  $\mu\text{L}/\text{min}$  (0.17 m/s), (j) 912  $\mu\text{L}/\text{min}$  (0.19 m/s), (k) 1008  $\mu\text{L}/\text{min}$  (0.21 m/s), (l) 1104  $\mu\text{L}/\text{min}$  (0.23 m/s), (m) 1296  $\mu\text{L}/\text{min}$  (0.27 m/s), (n) 1488  $\mu\text{L}/\text{min}$  (0.31 m/s), (o) 1680  $\mu\text{L}/\text{min}$  (0.35 m/s), (p) 1872  $\mu\text{L}/\text{min}$  (0.39 m/s), (q) 2064  $\mu\text{L}/\text{min}$  (0.43 m/s), (r) 2256  $\mu\text{L}/\text{min}$  (0.47 m/s), (s) 2448  $\mu\text{L}/\text{min}$  (0.51 m/s), (t) 2640  $\mu\text{L}/\text{min}$  (0.55 m/s), (u) 2832  $\mu\text{L}/\text{min}$  (0.59 m/s).

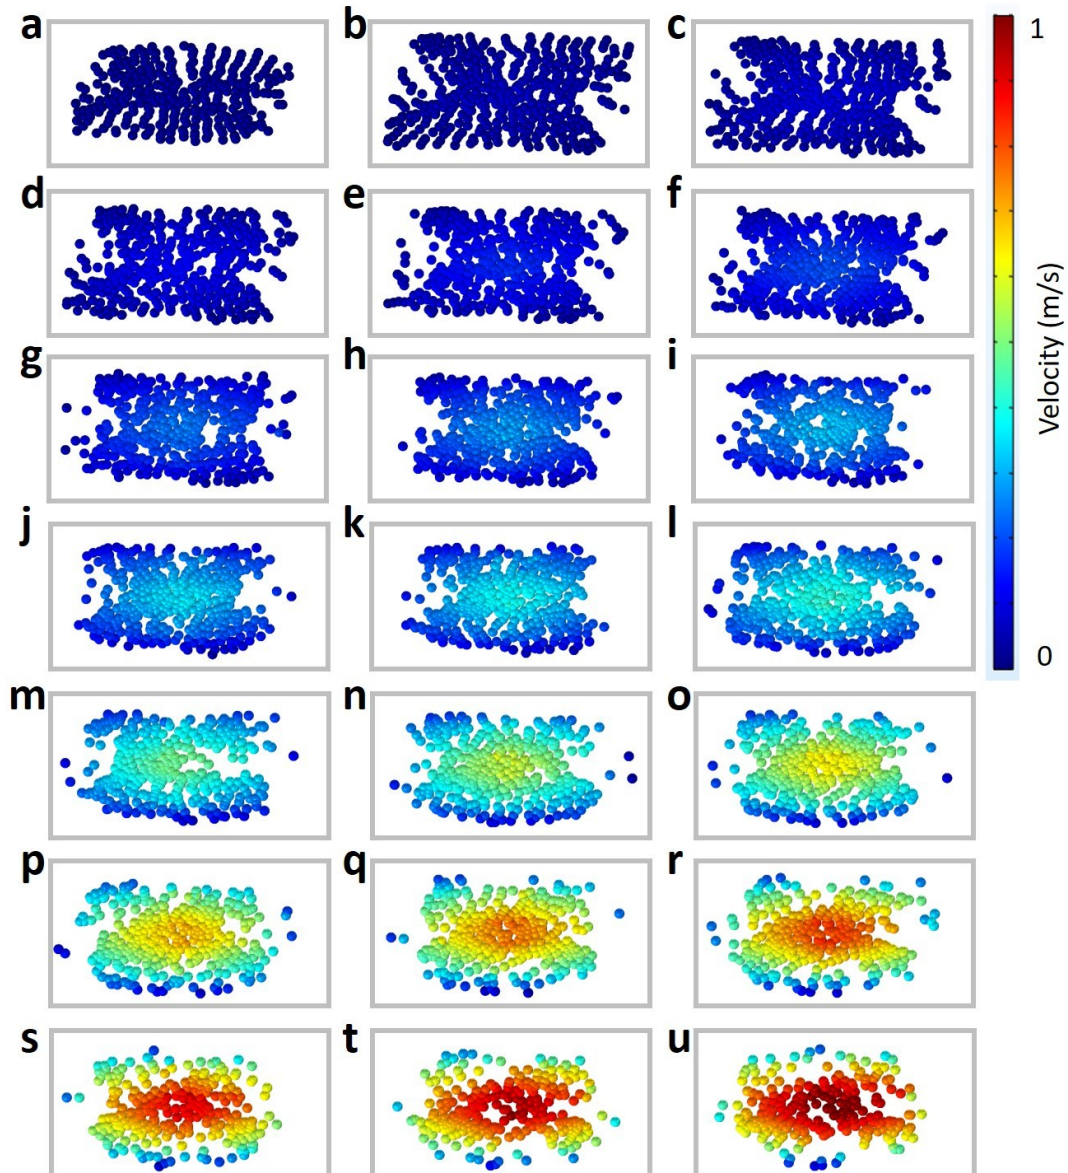

**Fig. S19.** The simulation results of different velocities (48  $\mu\text{L}/\text{min}$  – 2832  $\mu\text{L}/\text{min}$ ) in serpentine channel with the curvature of 10.0 mm. (a) 48  $\mu\text{L}/\text{min}$  (0.01 m/s), (b) 144  $\mu\text{L}/\text{min}$  (0.03 m/s), (c) 240  $\mu\text{L}/\text{min}$  (0.05 m/s), (d) 336  $\mu\text{L}/\text{min}$  (0.07 m/s), (e) 432  $\mu\text{L}/\text{min}$  (0.09 m/s), (f) 528  $\mu\text{L}/\text{min}$  (0.11 m/s), (g) 624  $\mu\text{L}/\text{min}$  (0.13 m/s), (h) 720  $\mu\text{L}/\text{min}$  (0.15 m/s), (i) 816  $\mu\text{L}/\text{min}$  (0.17 m/s), (j) 912  $\mu\text{L}/\text{min}$  (0.19 m/s), (k) 1008  $\mu\text{L}/\text{min}$  (0.21 m/s), (l) 1104  $\mu\text{L}/\text{min}$  (0.23 m/s), (m) 1296  $\mu\text{L}/\text{min}$  (0.27 m/s), (n) 1488  $\mu\text{L}/\text{min}$  (0.31 m/s), (o) 1680  $\mu\text{L}/\text{min}$  (0.35 m/s), (p) 1872  $\mu\text{L}/\text{min}$  (0.39 m/s), (q) 2064  $\mu\text{L}/\text{min}$  (0.43 m/s), (r) 2256  $\mu\text{L}/\text{min}$  (0.47 m/s), (s) 2448  $\mu\text{L}/\text{min}$  (0.51 m/s), (t) 2640  $\mu\text{L}/\text{min}$  (0.55 m/s), (u) 2832  $\mu\text{L}/\text{min}$  (0.59 m/s).



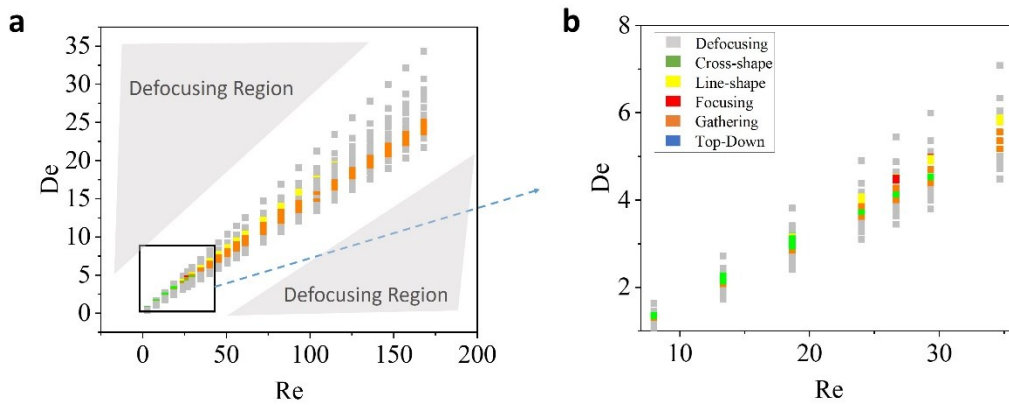

**Fig. S20.** Summarize the simulation results to six focusing status by dimensionless numbers ( $Re$ - $De$ ). (a) All simulation data in Fig. 4. The legend of (a) is the same as (b). (b) Partial enlarged detail in (a).

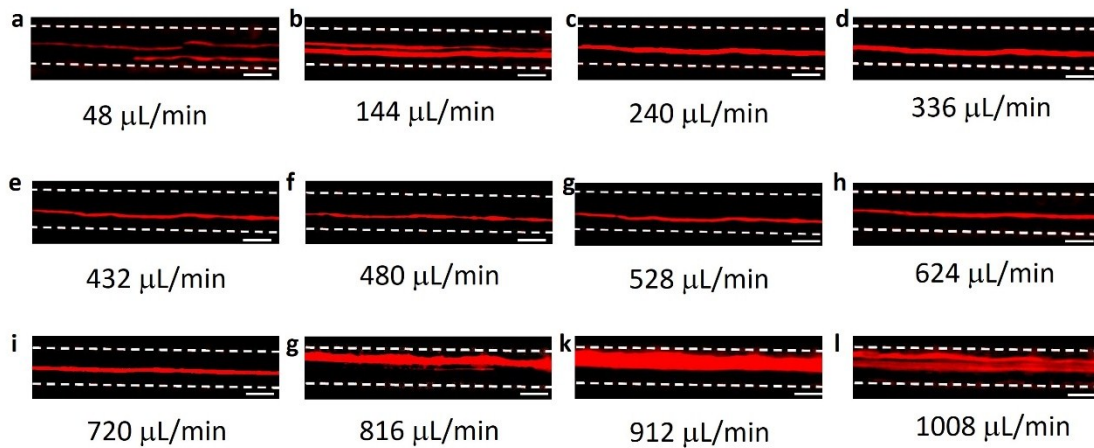

**Fig. S21.** Experimental results at the outlet of the microfluidic channels with 5.9 mm curvature radius by different flow throughput. Scale bar 200  $\mu\text{m}$ .



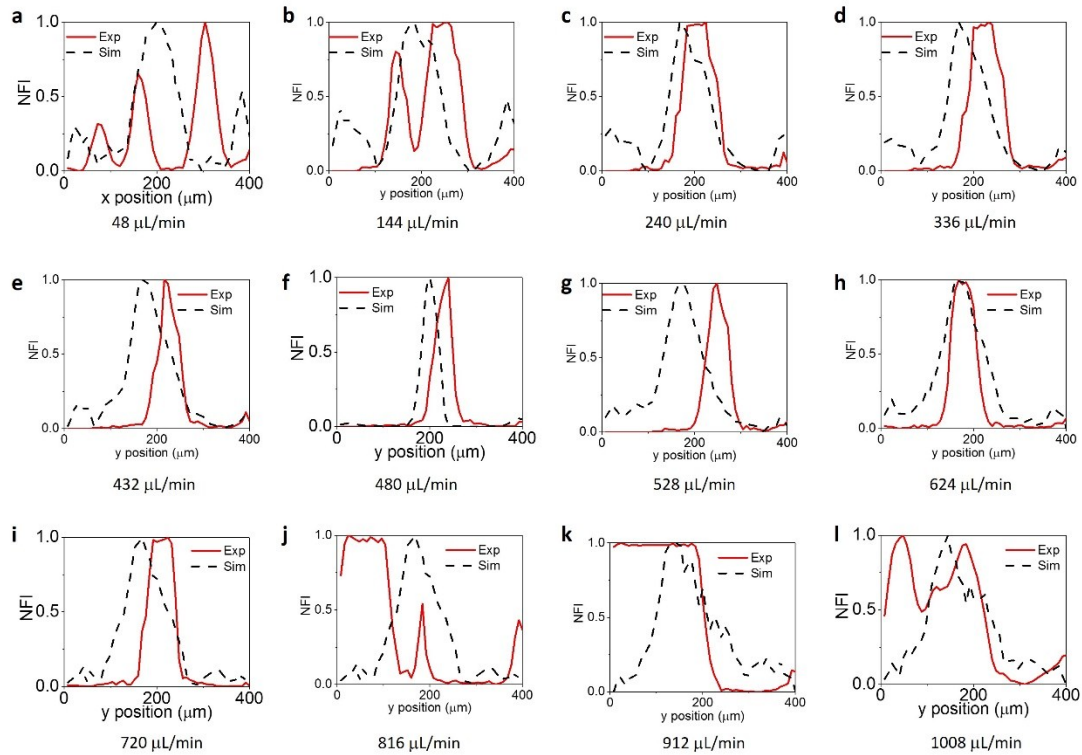

**Fig. S22.** the statistics of simulated and experiment data by NFI In the different fluid flow throughput (48  $\mu\text{L}/\text{min}$  – 1008  $\mu\text{L}/\text{min}$ ) with 5.9 mm curvature radius.

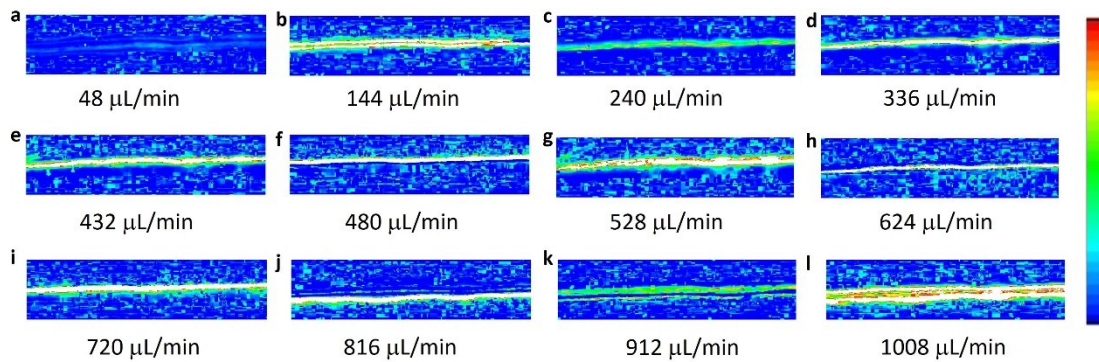

**Fig. S23.** The heat maps of experiments data in different fluid flow throughput (48  $\mu\text{L}/\text{min}$  – 1008  $\mu\text{L}/\text{min}$ ) with 5.9 mm curvature radius.

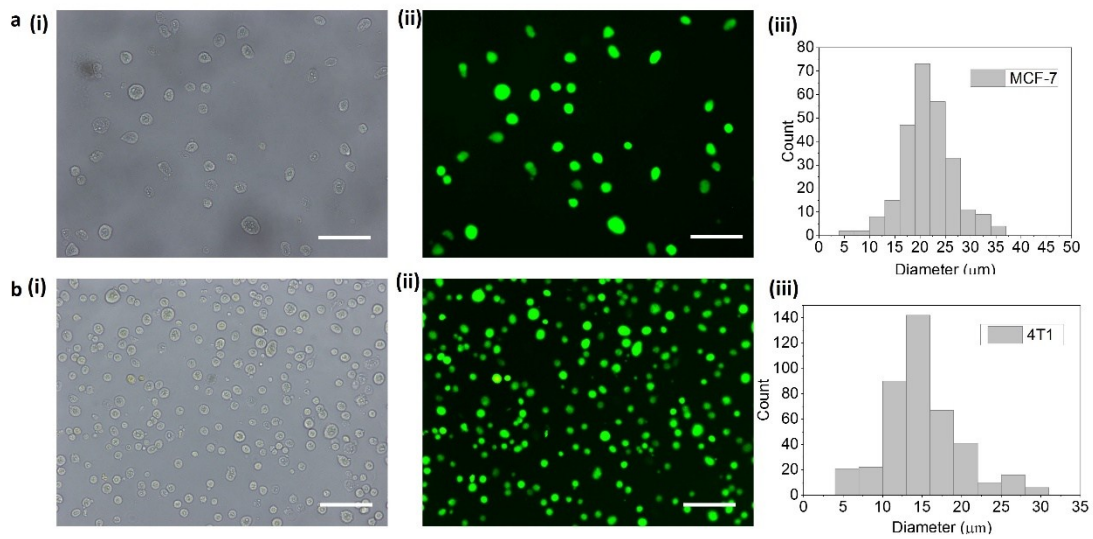

**Fig. S24.** Images and sizes of MCF-7 and 4T1 cancer cells. (a) Bright images (i), fluorescent images (ii) and the size distribution of MCF-7 cancer cells. (b) Bright images (i), fluorescent images (ii) and the size distribution of 4T1 cancer cells.

Table S2. The dimensionless number (Re, De) in different channel radius (2mm-5.85mm) and flow velocity (0.01m/s-0.59m/s).

| $r$ (mm)<br>Vel (m/s) | 2mm           | 3mm           | 4mm           | 4.5mm         | 5mm           | 5.5mm         | 5.8mm         | 5.85mm        |
|-----------------------|---------------|---------------|---------------|---------------|---------------|---------------|---------------|---------------|
| 0.01                  | 2.98, 0.77    | 2.98, 0.63    | 2.98, 0.54    | 2.98, 0.51    | 2.98, 0.49    | 2.98, 0.46    | 2.98, 0.45    | 2.98, 0.45    |
| 0.03                  | 8.95, 2.31    | 8.95, 1.89    | 8.95, 1.63    | 8.95, 1.54    | 8.95, 1.46    | 8.95, 1.39    | 8.95, 1.36    | 8.95, 1.35    |
| 0.05                  | 14.92, 3.85   | 14.92, 3.15   | 14.92, 2.72   | 14.92, 2.57   | 14.92, 2.44   | 14.92, 2.32   | 14.92, 2.26   | 14.92, 2.25   |
| 0.07                  | 20.89, 5.39   | 20.89, 4.4    | 20.89, 3.81   | 20.89, 3.6    | 20.89, 3.41   | 20.89, 3.25   | 20.89, 3.17   | 20.89, 3.15   |
| 0.09                  | 26.86, 6.93   | 26.86, 5.66   | 26.86, 4.9    | 26.86, 4.62   | 26.86, 4.39   | 26.86, 4.18   | 26.86, 4.07   | 26.86, 4.05   |
| 0.1                   | 29.84, 7.71   | 29.84, 6.29   | 29.84, 5.45   | 29.84, 5.14   | 29.84, 4.87   | 29.84, 4.65   | 29.84, 4.52   | 29.84, 4.51   |
| 0.11                  | 32.83, 8.48   | 32.83, 6.92   | 32.83, 5.99   | 32.83, 5.65   | 32.83, 5.36   | 32.83, 5.11   | 32.83, 4.98   | 32.83, 4.96   |
| 0.13                  | 38.79, 10.02  | 38.79, 8.18   | 38.79, 7.08   | 38.79, 6.68   | 38.79, 6.34   | 38.79, 6.04   | 38.79, 5.88   | 38.79, 5.86   |
| 0.15                  | 44.76, 11.56  | 44.76, 9.44   | 44.76, 8.17   | 44.76, 7.71   | 44.76, 7.31   | 44.76, 6.97   | 44.76, 6.79   | 44.76, 6.76   |
| 0.17                  | 50.73, 13.1   | 50.73, 10.7   | 50.73, 9.26   | 50.73, 8.73   | 50.73, 8.28   | 50.73, 7.9    | 50.73, 7.69   | 50.73, 7.66   |
| 0.19                  | 56.7, 14.64   | 56.7, 11.95   | 56.7, 10.35   | 56.7, 9.76    | 56.7, 9.26    | 56.7, 8.83    | 56.7, 8.6     | 56.7, 8.56    |
| 0.21                  | 62.67, 16.18  | 62.67, 13.21  | 62.67, 11.44  | 62.67, 10.79  | 62.67, 10.23  | 62.67, 9.76   | 62.67, 9.5    | 62.67, 9.46   |
| 0.23                  | 68.64, 17.72  | 68.64, 14.47  | 68.64, 12.53  | 68.64, 11.81  | 68.64, 11.21  | 68.64, 10.69  | 68.64, 10.41  | 68.64, 10.36  |
| 0.27                  | 80.57, 20.8   | 80.57, 16.99  | 80.57, 14.71  | 80.57, 13.87  | 80.57, 13.16  | 80.57, 12.55  | 80.57, 12.22  | 80.57, 12.16  |
| 0.31                  | 92.51, 23.89  | 92.51, 19.5   | 92.51, 16.89  | 92.51, 15.92  | 92.51, 15.11  | 92.51, 14.4   | 92.51, 14.03  | 92.51, 13.97  |
| 0.35                  | 104.45, 26.97 | 104.45, 22.02 | 104.45, 19.07 | 104.45, 17.98 | 104.45, 17.06 | 104.45, 16.26 | 104.45, 15.84 | 104.45, 15.77 |
| 0.39                  | 116.38, 30.05 | 116.38, 24.54 | 116.38, 21.25 | 116.38, 20.03 | 116.38, 19.01 | 116.38, 18.12 | 116.38, 17.65 | 116.38, 17.57 |
| 0.43                  | 128.32, 33.13 | 128.32, 27.05 | 128.32, 23.43 | 128.32, 22.09 | 128.32, 20.95 | 128.32, 19.98 | 128.32, 19.46 | 128.32, 19.37 |
| 0.47                  | 140.26, 36.21 | 140.26, 29.57 | 140.26, 25.61 | 140.26, 24.14 | 140.26, 22.9  | 140.26, 21.84 | 140.26, 21.27 | 140.26, 21.17 |
| 0.51                  | 152.19, 39.3  | 152.19, 32.09 | 152.19, 27.79 | 152.19, 26.2  | 152.19, 24.85 | 152.19, 23.7  | 152.19, 23.08 | 152.19, 22.98 |
| 0.55                  | 164.13, 42.38 | 164.13, 34.6  | 164.13, 29.97 | 164.13, 28.25 | 164.13, 26.8  | 164.13, 25.56 | 164.13, 24.89 | 164.13, 24.78 |
| 0.59                  | 176.07, 45.46 | 176.07, 37.12 | 176.07, 32.15 | 176.07, 30.31 | 176.07, 28.75 | 176.07, 27.41 | 176.07, 26.7  | 176.07, 26.58 |

Table S3. The dimensionless number (Re, De) in different channel radius (5.9mm-10mm) and flow velocity (0.01m/s-0.59m/s).

| $r$ (mm)<br>Vel (m/s) | 5.9mm         | 5.95mm        | 6mm           | 6.5mm         | 7mm           | 8mm           | 9mm           | 10mm          |
|-----------------------|---------------|---------------|---------------|---------------|---------------|---------------|---------------|---------------|
| 0.01                  | 2.98, 0.45    | 2.98, 0.45    | 2.98, 0.44    | 2.98, 0.43    | 2.98, 0.41    | 2.98, 0.39    | 2.98, 0.36    | 2.98, 0.34    |
| 0.03                  | 8.95, 1.35    | 8.95, 1.34    | 8.95, 1.33    | 8.95, 1.28    | 8.95, 1.24    | 8.95, 1.16    | 8.95, 1.09    | 8.95, 1.03    |
| 0.05                  | 14.92, 2.24   | 14.92, 2.23   | 14.92, 2.22   | 14.92, 2.14   | 14.92, 2.06   | 14.92, 1.93   | 14.92, 1.82   | 14.92, 1.72   |
| 0.07                  | 20.89, 3.14   | 20.89, 3.13   | 20.89, 3.11   | 20.89, 2.99   | 20.89, 2.88   | 20.89, 2.7    | 20.89, 2.54   | 20.89, 2.41   |
| 0.09                  | 26.86, 4.04   | 26.86, 4.02   | 26.86, 4      | 26.86, 3.85   | 26.86, 3.71   | 26.86, 3.47   | 26.86, 3.27   | 26.86, 3.1    |
| 0.1                   | 29.84, 4.49   | 29.84, 4.47   | 29.84, 4.45   | 29.84, 4.27   | 29.84, 4.12   | 29.84, 3.85   | 29.84, 3.63   | 29.84, 3.45   |
| 0.11                  | 32.83, 4.93   | 32.83, 4.91   | 32.83, 4.89   | 32.83, 4.7    | 32.83, 4.53   | 32.83, 4.24   | 32.83, 4      | 32.83, 3.79   |
| 0.13                  | 38.79, 5.83   | 38.79, 5.81   | 38.79, 5.78   | 38.79, 5.56   | 38.79, 5.35   | 38.79, 5.01   | 38.79, 4.72   | 38.79, 4.48   |
| 0.15                  | 44.76, 6.73   | 44.76, 6.7    | 44.76, 6.67   | 44.76, 6.41   | 44.76, 6.18   | 44.76, 5.78   | 44.76, 5.45   | 44.76, 5.17   |
| 0.17                  | 50.73, 7.63   | 50.73, 7.59   | 50.73, 7.56   | 50.73, 7.27   | 50.73, 7      | 50.73, 6.55   | 50.73, 6.17   | 50.73, 5.86   |
| 0.19                  | 56.7, 8.52    | 56.7, 8.49    | 56.7, 8.45    | 56.7, 8.12    | 56.7, 7.83    | 56.7, 7.32    | 56.7, 6.9     | 56.7, 6.55    |
| 0.21                  | 62.67, 9.42   | 62.67, 9.38   | 62.67, 9.34   | 62.67, 8.98   | 62.67, 8.65   | 62.67, 8.09   | 62.67, 7.63   | 62.67, 7.24   |
| 0.23                  | 68.64, 10.32  | 68.64, 10.27  | 68.64, 10.23  | 68.64, 9.83   | 68.64, 9.47   | 68.64, 8.86   | 68.64, 8.35   | 68.64, 7.93   |
| 0.27                  | 80.57, 12.11  | 80.57, 12.06  | 80.57, 12.01  | 80.57, 11.54  | 80.57, 11.12  | 80.57, 10.4   | 80.57, 9.81   | 80.57, 9.3    |
| 0.31                  | 92.51, 13.91  | 92.51, 13.85  | 92.51, 13.79  | 92.51, 13.25  | 92.51, 12.77  | 92.51, 11.94  | 92.51, 11.26  | 92.51, 10.68  |
| 0.35                  | 104.45, 15.7  | 104.45, 15.64 | 104.45, 15.57 | 104.45, 14.96 | 104.45, 14.42 | 104.45, 13.48 | 104.45, 12.71 | 104.45, 12.06 |
| 0.39                  | 116.38, 17.5  | 116.38, 17.42 | 116.38, 17.35 | 116.38, 16.67 | 116.38, 16.06 | 116.38, 15.03 | 116.38, 14.17 | 116.38, 13.44 |
| 0.43                  | 128.32, 19.29 | 128.32, 19.21 | 128.32, 19.13 | 128.32, 18.38 | 128.32, 17.71 | 128.32, 16.57 | 128.32, 15.62 | 128.32, 14.82 |
| 0.47                  | 140.26, 21.08 | 140.26, 21    | 140.26, 20.91 | 140.26, 20.09 | 140.26, 19.36 | 140.26, 18.11 | 140.26, 17.07 | 140.26, 16.2  |
| 0.51                  | 152.19, 22.88 | 152.19, 22.78 | 152.19, 22.69 | 152.19, 21.8  | 152.19, 21    | 152.19, 19.65 | 152.19, 18.52 | 152.19, 17.57 |
| 0.55                  | 164.13, 24.67 | 164.13, 24.57 | 164.13, 24.47 | 164.13, 23.51 | 164.13, 22.65 | 164.13, 21.19 | 164.13, 19.98 | 164.13, 18.95 |
| 0.59                  | 176.07, 26.47 | 176.07, 26.36 | 176.07, 26.25 | 176.07, 25.22 | 176.07, 24.3  | 176.07, 22.73 | 176.07, 21.43 | 176.07, 20.33 |
